# Supplementary material for: Patient experience of NHS health checks: a systematic review and qualitative synthesis
Source: PubMed Central journal article supplement (PMC5724113; doi:10.1136/bmjopen-2017-017169), 2017-08-11
Supplement: bmjopen-2017-017169.draft_revisions.pdf [file bmjopen-2017-017169.draft_revisions.pdf]

# BMJ Open

BMJ Open is committed to open peer review. As part of this commitment we make the peer review history of every article we publish publicly available.

When an article is published we post the peer reviewers' comments and the authors' responses online. We also post the versions of the paper that were used during peer review. These are the versions that the peer review comments apply to.

The versions of the paper that follow are the versions that were submitted during the peer review process. They are not the versions of record or the final published versions. They should not be cited or distributed as the published version of this manuscript.

BMJ Open is an open access journal and the full, final, typeset and author-corrected version of record of the manuscript is available on our site with no access controls, subscription charges or pay-per-view fees (<http://bmjopen.bmj.com>).

If you have any questions on BMJ Open's open peer review process please email [editorial.bmjopen@bmj.com](mailto:editorial.bmjopen@bmj.com)

# BMJ Open

## Patient experience of NHS Health Checks: a systematic review and qualitative synthesis

|                                 |                                                                                                                                                                                                                                                                                                                                                                                                                                                                                                                                                                                                                                     |
|---------------------------------|-------------------------------------------------------------------------------------------------------------------------------------------------------------------------------------------------------------------------------------------------------------------------------------------------------------------------------------------------------------------------------------------------------------------------------------------------------------------------------------------------------------------------------------------------------------------------------------------------------------------------------------|
| Journal:                        | <i>BMJ Open</i>                                                                                                                                                                                                                                                                                                                                                                                                                                                                                                                                                                                                                     |
| Manuscript ID                   | bmjopen-2017-017169                                                                                                                                                                                                                                                                                                                                                                                                                                                                                                                                                                                                                 |
| Article Type:                   | Research                                                                                                                                                                                                                                                                                                                                                                                                                                                                                                                                                                                                                            |
| Date Submitted by the Author:   | 05-Apr-2017                                                                                                                                                                                                                                                                                                                                                                                                                                                                                                                                                                                                                         |
| Complete List of Authors:       | Usher-Smith, Juliet; University of Cambridge, The Primary Care Unit<br>Harte, Emma; RAND Europe<br>MaLure, Calum; RAND Europe<br>Martin, Adam; Academic Unit of Health Economics, Leeds Institute of Health Sciences<br>Saunders, Katie; University of Cambridge,<br>Meads, Catherine; Anglia Ruskin University, Faculty of Health, Social Care and Education<br>Walter, Fiona; University of Cambridge, Dept of Public Health and Primary Care<br>Griffin, Simon; University of Cambridge, The Primary Care Unit; University of Cambridge, MRC Epidemiology Unit<br>Mant, Jonathan; University of Cambridge, The Primary Care Unit |
| <b>Primary Subject Heading</b>: | Public health                                                                                                                                                                                                                                                                                                                                                                                                                                                                                                                                                                                                                       |
| Secondary Subject Heading:      | Cardiovascular medicine, Communication, Qualitative research                                                                                                                                                                                                                                                                                                                                                                                                                                                                                                                                                                        |
| Keywords:                       | NHS Health Check, patient experience, systematic review, qualitative synthesis                                                                                                                                                                                                                                                                                                                                                                                                                                                                                                                                                      |
|                                 |                                                                                                                                                                                                                                                                                                                                                                                                                                                                                                                                                                                                                                     |

SCHOLARONE™  
Manuscripts

1  
2  
3 **Patient experience of NHS Health Checks: a systematic review and qualitative synthesis**  
4

5  
6 Usher-Smith JA<sup>1</sup>, Harte E<sup>2</sup>, MacLure C<sup>2</sup>, Martin A<sup>3</sup>, Saunders CL<sup>1</sup>, Meads C<sup>4</sup>, Walter FM<sup>1</sup>,  
7  
8 Griffin SJ<sup>1,5</sup>, Mant J<sup>1</sup>.  
9

10  
11 <sup>1</sup>The Primary Care Unit, Institute of Public Health, University of Cambridge, Box 113  
12 Cambridge Biomedical Campus, Cambridge, CB2 0SR, UK

13  
14 <sup>2</sup>RAND Europe, Westbrook Centre, Milton Road, Cambridge, CB4 1YG, UK

15  
16 <sup>3</sup>Academic Unit of Health Economics, Leeds Institute of Health Sciences, University of  
17 Leeds, Leeds, LS2 9LJ, UK

18  
19 <sup>4</sup>Faculty of Health, Social Care and Education, Anglia Ruskin University

20  
21 <sup>5</sup>MRC Epidemiology Unit, University of Cambridge, Institute of Metabolic Science,  
22 Cambridge, CB2 0QQ, UK  
23

24  
25  
26 Correspondence to: Juliet Usher-Smith [jau20@medschl.cam.ac.uk](mailto:jau20@medschl.cam.ac.uk)  
27

28  
29  
30 Key words: NHS Health Check, patient experience, systematic review, qualitative synthesis  
31  
32  
33  
34  
35  
36  
37  
38  
39  
40  
41  
42  
43  
44  
45  
46  
47  
48  
49  
50  
51  
52  
53  
54  
55  
56  
57  
58  
59  
60

**ABSTRACT (300 words)**

**Objective:** To review the experiences of patients attending NHS Health Checks in England.

**Design:** A systematic review of quantitative and qualitative studies with a narrative synthesis of quantitative studies and thematic synthesis of qualitative studies.

**Data sources:** An electronic literature search of Medline, Embase, Health Management Information Consortium (HMIC), Cumulative Index of Nursing and Allied Health Literature (CINAHL), Global Health, PsycInfo, Web of Science, OpenGrey, the Cochrane Library, NHS Evidence, Google Scholar, Google, Clinical Trials.gov and the ISRCTN registry to 09/11/16 with no language restriction and manual screening of reference lists of all included papers.

**Inclusion criteria:** Primary research reporting experiences of patients who have attended NHS Health Checks.

**Results:** 20 studies met the inclusion criteria, 9 reporting quantitative data and 15 qualitative data. There were consistently high levels of reported satisfaction in surveys, with over 80% feeling that they had benefited from the process. Data from qualitative studies showed that the NHS Health Check had been perceived to act as a wake-up call for many who reported having gone on to make substantial lifestyle changes which they attributed to the NHS Health Check. However, some had been left with a feeling of unmet expectations, were confused about or unable to remember their risk scores, found the lifestyle advice too simplistic and non-personalised, or were confused about follow-up.

**Conclusions:** Whilst participants were generally very supportive of the NHS Health Check programme and examples of behaviour change were reported, there are a number of areas where improvements could be made. These include greater clarity around the aims of the programme within the promotional material, more pro-active support for lifestyle change, and greater appreciation of the challenges of communicating risk and the limitations of relying on the risk score alone as a trigger for facilitating behaviour change.

**Strengths and limitations of this study**

- This is the first study to systematically review quantitative and qualitative studies that consider the experiences of patients who have attended NHS Health Checks.
- The use of broad inclusion criteria and the systematic search of multiple databases and the grey literature allowed us to include studies that had not been published in peer reviewed scientific journals.
- The included studies were of varying quality.
- The quantitative studies reporting responses to surveys had response rates between 23% and 43%, making them at risk of responder bias.
- The qualitative studies included small, selected groups of participants whose expressed views were likely to be affected by both recall bias and social desirability bias.

peer review only

## INTRODUCTION

The NHS Health Check programme is one of the largest current prevention initiatives in England. Introduced in 2009 to improve cardiovascular disease (CVD) risk factors through behavioural change and treatment informed by risk stratification, it became a mandated public health service in 2013. Local authorities are now responsible for offering an NHS Health Check to individuals aged 40-74 without existing cardiovascular disease, diabetes or hypertension every five years. The NHS Health Check itself consists of three components: risk assessment, communication of risk and risk management. Risk tools are used to establish the individual's risk of developing CVD and diabetes. That assessment is then used to raise awareness of relevant risk factors and inform discussion about the lifestyle and medical approaches best suited to managing the individual's risk of disease. Based on modelling studies of cross-sectional data it was estimated that the programme could prevent 1,600 heart attacks and strokes, at least 650 premature deaths, and over 4,000 new cases of diabetes each year with an estimated cost per quality adjusted life year (QALY) of approximately £3,000<sup>1</sup>. However, whether NHS Health Checks represent an efficient use of scarce health promotion resources has been questioned.

Alongside clinical effectiveness and safety, patient experience is increasingly recognised worldwide as one of the three elements of high-quality healthcare<sup>2-4</sup>. As well as enabling a better understanding of current problems with healthcare delivery, informing continuous improvement and redesign of services and helping professionals reflect on practice, a recent systematic review has shown that patient experience is positively associated with self-rated and objectively measured health outcomes; adherence to recommended medication and treatments; preventative care; healthcare resource use; technical quality-of-care delivery; and adverse events<sup>5,6</sup>. There is also an association at the organizational level; general practices that provide higher quality clinical care (measured through higher QOF performance) are also those in which reported patient experience is better. Understanding patients' experiences of NHS Health Checks is, therefore, central to understanding the implementation of the programme, its potential impact over the first eight years, and ways in which it might be improved.

Since the introduction of the NHS Health Check programme, a growing number of both quantitative and qualitative studies reporting patients' experiences of NHS Health Checks have been published. This article provides the first systematic synthesis of these studies.

## METHODS

We performed a systematic literature review following a study protocol (available on request) that followed the PRISMA guidelines.

### Search strategy

We used the results of an existing literature review conducted by Public Health England covering the period from 1<sup>st</sup> January 1996 to 9<sup>th</sup> November 2016 supplemented by a search of the Web of Science, Science Citation Index and OpenGrey covering the same period, and hand searching of the reference lists of all included publications. The PHE literature review included the following sources: Medline, Embase, Health Management Information Consortium (HMIC), Cumulative Index of Nursing and Allied Health Literature (CINAHL), Global Health, PsycInfo, the Cochrane Library, NHS Evidence, Google Scholar, Google, Clinical Trials.gov and the ISRCTN registry. Full details of all the search strategies are shown in Appendix 1. No language restrictions were applied.

### Study selection

To be included studies had to be primary research reporting the opinions or experiences of people who had attended NHS Health Checks. Commentaries, editorials and opinion pieces were excluded.

The selection of studies was performed in a two-stage process. First, the titles and abstracts were screened to identify studies relevant to the NHS Health Check. This stage had already been completed by a senior information scientist at PHE for those identified in the literature review conducted by PHE. One reviewer (EH) followed this process for the additional citations identified from the Web of Science database.

In the second stage two researchers (JUS and AM) reviewed the full texts of all studies identified as relevant to the NHS Health Checks to select those reporting the opinions or experiences of people who had attended NHS Health Checks. Where it was unclear whether or not these inclusion criteria were met for any given study, we discussed those studies at consensus meetings with the wider research team.

### Data extraction, quality assessment and synthesis

1  
2  
3 Data on the study design, time period, recruitment methods, participants, analysis, and  
4 quantitative results were extracted independently for each study by two reviewers (JUS +  
5 EH/CMa) onto data extraction forms developed to minimise bias. The quality of all included  
6 studies was assessed at the same time using the Critical Appraisal Skills Programmes (CASP)  
7 checklist for qualitative research<sup>7</sup> or a checklist combining the CASP checklists for cohort  
8 studies and randomised-controlled trials for the quantitative studies. For studies that included  
9 both quantitative and qualitative methods, quality assessment was completed separately for  
10 both aspects of the study.  
11  
12  
13  
14  
15  
16

17  
18 We synthesised the qualitative data using thematic synthesis. Following reading and re-  
19 reading of the included studies, this synthesis included three stages<sup>8</sup>: 1) coding of the findings  
20 of the primary studies; 2) organisation of these codes into related areas to develop descriptive  
21 themes; and 3) the development of analytical themes. The initial coding of the findings of the  
22 primary studies was performed by at least two researchers (JUS + EH/CMa). These findings  
23 were then discussed with members of the wider research team and the subsequent stages were  
24 an iterative process with both the descriptive and analytical themes developed through a  
25 series of meetings involving researchers from a range of clinical and non-clinical  
26 backgrounds. To allow an appreciation of the primary data, we have included illustrative  
27 quotations from the original studies alongside the analytical themes in this report.  
28  
29  
30  
31  
32  
33  
34  
35

## 36 RESULTS

37  
38 From an initial 18,524 titles and abstracts, 178 articles were identified as potentially relevant  
39 to the NHS Health Checks and were reviewed at full text level (Figure 1). Of those, we  
40 excluded 162. The most common reasons for excluding papers were that they did not include  
41 any relevant data, were duplicates or commentaries, or did not describe NHS Health Checks.  
42 Four additional articles were identified through citation searching. This review is, therefore,  
43 based on 20 articles.  
44  
45  
46  
47  
48

### 49 Quantitative results from patient satisfaction questionnaires

50  
51 Of those 20 articles, nine include quantitative results from surveys of participants who had  
52 attended NHS Health Checks<sup>9-17</sup>. The details of these nine articles are shown in Table 1 and  
53 full details of the quality assessment in Appendix 2. Four are high quality journal articles  
54 published in peer reviewed journals in which questionnaires were sent to all those who had  
55 attended an NHS Health Check in either general practices<sup>9,10</sup> or pharmacies<sup>16,17</sup>. Response  
56  
57  
58  
59  
60



1  
2  
3 rates were between 23.4% and 43%. A fifth study of the views of those attending outreach  
4 clinic at cricket groups was also published in a peer reviewed journal but does not report the  
5 methods in detail or the response rate<sup>12</sup>. Another is a report of a service evaluation in which  
6 the views of ethnic minority participants were particularly sought<sup>13</sup> and the final three are low  
7 quality case study reports which have not reported methods or response rate<sup>11,14,15</sup>.

8  
9  
10  
11  
12  
13 All included studies report high levels of satisfaction, with almost all respondents across the  
14 range of settings reporting a positive experience and over 80% feeling that they had benefited  
15 from the process. When reported, nine out of ten respondents also felt that they had been  
16 given enough time, had been able to ask all their questions, and would recommend the  
17 process to others.  
18  
19  
20

### 21 22 23 **Qualitative data on patient experience**

24 Patient experience was also reported in 15 qualitative studies. Three performed content  
25 analysis on free-text responses provided in surveys<sup>9,10,13</sup> whilst the others conducted focus  
26 groups or interviews with between 8 and 45 participants. Ten are journal articles published in  
27 peer reviewed journals<sup>9,10,17-24</sup> four are research reports of service evaluations<sup>13,25-27</sup>, and one  
28 is a Masters thesis<sup>28</sup>. All recruited people who had attended NHS Health Checks either  
29 through invitations sent out from general practices or from community settings. Most  
30 included approximately equal numbers of men and women. Three studies had particularly  
31 sought to describe the experiences of those from ethnic minority groups<sup>13,23,24</sup>. Further details  
32 of the design and methods used in those studies are given in Table 2 and the full quality  
33 assessment in Appendix 3.  
34  
35  
36  
37  
38  
39  
40  
41  
42

43 Thematic synthesis of these 15 studies identified five main analytical themes: 1) The NHS  
44 Health Check as a potential trigger for behaviour change; 2) Unmet expectations; 3) Limited  
45 understanding of the risk score; 4) Preference for better information; and 5) Confusion  
46 around follow-up. The primary articles contributing to each of those themes are shown in  
47 Table 3 and details of each of the themes given below.  
48  
49  
50  
51  
52

#### 53 ***1. The NHS Health Check as a potential trigger for behaviour change***

54 Participants variously described the NHS Health Check as a “wake-up call”<sup>13,21</sup>, a “reality  
55 check”<sup>21</sup>, a “kind of turning point”<sup>28</sup>, a “nudge”<sup>17</sup>, an “eye-opener”<sup>24</sup>, or a “prompt”<sup>26</sup> which  
56 helped bring patients’ health into focus by highlighting underlying health issues of which  
57  
58  
59  
60

1  
2  
3 they were not necessarily cognizant<sup>10</sup> and making them aware that there were lifestyle-related  
4 diseases to which they may be susceptible and which they may be able to prevent<sup>24</sup>.  
5  
6

7  
8 *“It’s really good. It makes you aware of what problems are around. What you can get*  
9 *and that. It is really good. It teaches you..it’s an eye-opener for people who would*  
10 *want to do things properly”*<sup>24</sup>  
11  
12

13  
14 For some, this reputedly led on to behaviour change, with many of the studies citing  
15 examples of participants who had reported making changes that they attributed to having  
16 attended the NHS Health Check<sup>18,21–25,29</sup>. These included changes to diet, cutting down on  
17 smoking, decreasing alcohol intake and increasing physical activity.  
18  
19  
20

21  
22  
23 *“I’ve changed my diet um and, and lost a stone in weight I think as a result actually.*  
24 *So I’m quite happy with that, that makes me feel even healthier”*<sup>22</sup>  
25  
26

27  
28 *“Having the results of the check, I’ve actually started to go to [swimming baths] a*  
29 *couple of times, so I’ve made some progress....and I’ve actually felt better in meself.”*  
30  
31  
32

33  
34 In general, dietary changes were perceived to be the easiest changes to make, particularly  
35 small changes that did not cause too much disruption to their daily routines<sup>29</sup> and there was  
36 recognition that changing behaviour was hard, with a number of barriers identified (Box 1).  
37  
38  
39

## 40 41 **2. Unmet expectations**

42  
43 Despite this potential influence on behaviour, a strong theme throughout many of the studies  
44 was that of unmet expectations that some participants were left with at the end of the NHS  
45 Health Check.  
46  
47

48  
49 For many, this arose from confusion about the purpose of the NHS Health Check. The  
50 comparison made between the NHS Health Check and an ‘MOT’ in the promotional material  
51 and the use of the term ‘Health Check’ left many expecting the NHS Health Check to include  
52 a more general wide-ranging assessment of health and not just risk of cardiovascular  
53 disease<sup>10,18,26</sup>.  
54  
55  
56  
57  
58  
59  
60

1  
2  
3 *“I just assumed that they would test you for everything when you were there. My*  
4 *perception of reading through things was that it was going to be a good overhaul, you*  
5 *know overall body check for everything.”*<sup>26</sup>  
6  
7

8  
9  
10 *“As a general health check it was not a series of tests as I expected. Only centred*  
11 *around the result of a blood test. Not comprehensive as I would have expected”*<sup>9</sup>  
12  
13

14 Additional specific areas that participants had been expecting or thought should be covered  
15 included: a Well woman check<sup>26</sup>; diabetes checks for all<sup>23,26,27</sup>; cancer screening<sup>18,26,28</sup>; an  
16 assessment of mental well-being<sup>18</sup>; an ECG<sup>18</sup>; testing for anaemia<sup>18</sup>; discussion around health  
17 conditions that impacted on their daily lives, such as joint and back pain<sup>28</sup>; and chronic long-  
18 term conditions<sup>27</sup>.  
19  
20  
21  
22

### 23 **3. Limited understanding of the risk score**

24 Whilst some participants reported improved understanding of CVD risk following an NHS  
25 Health Check<sup>9,17,24</sup>, a common theme throughout the studies was participants' limited  
26 understanding of the risk score.  
27  
28  
29  
30  
31

32 Across many of the studies there was evidence that a large number of participants were either  
33 not able to recall being provided with a risk estimate at all<sup>9,18,19</sup>, found the risk score  
34 confusing<sup>10,22,26</sup>, or had interpreted it incorrectly<sup>18,21,22,28</sup>.  
35  
36  
37  
38

39 *“my cholesterol is high...and, I had a score saying sixteen per cent diabetes in ten*  
40 *years. What does that mean? I've got no idea what that means. It sounds bad because*  
41 *it's higher than it's meant to be but is it?”*<sup>22</sup>  
42  
43  
44

45  
46 *“My QRisk score is 11 per cent. But after getting someone to Google it for me, we*  
47 *still have no idea what it means. It should be explained better in a letter from the*  
48 *Doctor”*<sup>10</sup>  
49  
50  
51

52 The score itself also appeared to have little meaning or significance for most participants.  
53 Low scores (<20% 10-year estimated risk) were sometimes perceived as meaning there was  
54 nothing to worry about<sup>21</sup>, but participants with low-risk scores were as likely to report being  
55 worried or anxious after receiving the scores as those with high-risk scores<sup>22</sup>. When  
56  
57  
58  
59  
60

1  
2  
3 describing their motivation to change behaviour, in general participants also described how it  
4 was not necessarily related to their risk score, and how even a high risk score was not  
5 necessarily enough to motivate them to try and change<sup>21,28</sup>.  
6  
7

8  
9  
10 *“Sometimes you need a reason and I think it was like me, I needed a reason [to*  
11 *change] and isn't it sad that showing me the percentage wasn't reason enough for me*  
12 *to give up [smoking].”<sup>21</sup>*  
13

#### 14 15 16 **4. Preferences for better information**

17 Most participants reported receiving lifestyle advice within the NHS Health Check. Many,  
18 however, felt it was too simple, brief, superficial or generic and felt that they would have  
19 benefitted from more detail and more personalised information<sup>13,17,21,22,24,28,29</sup>.  
20  
21

22  
23  
24 *“And it was that kind of information which was the kind of the bit beyond, you know,*  
25 *eat less, exercise more, don't smoke, don't drink .. that would have been useful ..the*  
26 *kind of advice that was on offer was actually very, um, simple”<sup>22</sup>*  
27  
28

29  
30  
31 For some this lack of personalised information led to confusion and uncertainty<sup>28</sup>, with some  
32 feeling that they had received mixed messages about their health<sup>18</sup> and been left unsure about  
33 what actions they should take<sup>25</sup>. This was not a universal view, however, with some seeing  
34 the value in being provided with ‘common knowledge’ again as it afforded a fresh way of  
35 looking at their lifestyle and, in one study the simplicity of the information appeared to  
36 encourage participants to make changes to their behaviour<sup>21</sup>.  
37  
38  
39

40  
41  
42  
43 *“So I thought it was very helpful it was very informative and it was thought-*  
44 *provoking, it just gave us some fresh view on things, because you can get very easily*  
45 *into doing what you think is okay”<sup>28</sup>*  
46  
47

48  
49  
50 In most cases the lifestyle advice had been provided face-to-face but participants also valued,  
51 or felt it would have been helpful to have received, written information both for their own  
52 reference and also as a means to encourage behaviour change among friends and  
53 family<sup>10,21,26</sup>.  
54  
55  
56  
57  
58  
59  
60

1  
2  
3           *“Well I suppose it’s good to have a question and answer thing cos you can have*  
4           *somebody explain it to you. But I suppose you could, something written’d be quite*  
5           *useful.”*<sup>18</sup>  
6  
7

### 10           **5. Confusion around follow-up**

11           The final theme related to confusion over follow-up<sup>13,24,25</sup>. This was particularly seen  
12           amongst participants who had attended NHS Health Checks in community settings.  
13           Individuals felt unsure about what steps should be taken next, specifically in relation to  
14           whether they needed to contact their GP or if their GP would contact them if any causes for  
15           concern had been identified<sup>25</sup>. Participants also reported a lack of sufficient information on  
16           follow-up and sign-posting to other NHS services<sup>13</sup>.  
17  
18  
19  
20

21  
22  
23           *“She never said go and see your doctor. She ran out of some leaflets and she circled*  
24           *them and said go on the Internet”*<sup>13</sup>  
25  
26

27  
28           Some participants also reported that they would have liked their healthcare professionals to  
29           be more pro-active in supporting them to make lifestyle changes and felt there should have  
30           been on-going follow-up and monitoring<sup>18,24,27</sup>.  
31  
32

## 33           **DISCUSSION**

### 34           **Principal findings**

35  
36           This study is the first systematic review of patient experience of NHS Health Checks. It  
37           shows that, amongst those who respond to patient satisfaction surveys, there are consistently  
38           very high levels of satisfaction with NHS Health Checks reported, with over 80% feeling that  
39           they had benefited from the process. However, despite these overall high levels of  
40           satisfaction, there was evidence from interviews that some participants were left with a  
41           feeling of unmet expectations. For some this appeared to arise from confusion about the  
42           purpose of the NHS Health Check whilst others had been expecting a more general  
43           assessment of health. The cardiovascular risk score also appeared to generate confusion: it  
44           was poorly understood, interpreted differently among individuals with the same level of risk,  
45           and seemed to have little meaning or significance for people in terms of how to use it to think  
46           about their health and future planning. Most participants reported receiving lifestyle  
47           information within the NHS Health Check but for many it was regarded as too simple and not  
48           sufficiently personalised. Nevertheless, there was evidence that the NHS Health Check was  
49  
50  
51  
52  
53  
54  
55  
56  
57  
58  
59  
60

1  
2  
3 perceived to act as a wake-up call for many participants who had gone on to make substantial  
4 lifestyle changes which they attributed to the NHS Health Check.  
5  
6  
7

### 8 **Strengths and Limitations**

9  
10 The main strengths of this review are the systematic search of multiple electronic databases,  
11 the manual searching of the reference lists of all included studies, and the thematic approach  
12 to synthesis of the qualitative data. By including searches of the grey literature and the  
13 internet alongside electronic repositories we were able to include studies that have not been  
14 published in peer reviewed scientific journals, reducing the risk of selective reporting bias.  
15  
16 Whilst we cannot exclude the possibility that additional local evaluations may have been  
17 performed or that we overlooked studies at the screening stage, we think it unlikely that they  
18 would substantially alter the main findings. Choosing to conduct a thematic synthesis for the  
19 qualitative research also ensured that we used a systematic approach to identify common  
20 themes across the studies and interpret those findings. Although some argue against the  
21 synthesis of qualitative research on the grounds that the findings of individual studies are de-  
22 contextualised and the concepts identified in one setting are not applicable to another<sup>30</sup>, this  
23 approach enabled us not only to provide a synthesis of the evidence to inform practice but  
24 also to develop additional interpretations and conceptual insights beyond the findings of the  
25 primary studies.  
26  
27  
28  
29  
30  
31  
32  
33  
34  
35

36 The main limitations relate to the included studies. The quantitative surveys were of varying  
37 quality with response rates only reported in four of the nine studies and comparison between  
38 responders and non-responders only in one. Where reported, the response rates varied  
39 between 23% and 43%. Although survey response rates alone are a poor indicator of bias<sup>31,32</sup>,  
40 the included studies are, therefore, all at risk of responder bias, and may represent the views  
41 of those more engaged with preventive healthcare or with particularly strong opinions. Many  
42 also measured patient satisfaction rather than patient experience. Unlike patient experience  
43 data which aim to avoid value judgments, patient satisfaction is a broad and often ill-defined  
44 concept that is multi-dimensional and influenced by a range of factors, including cultural  
45 norms, health status and prior experience of health care<sup>33</sup>. Reports of patient satisfaction can,  
46 therefore, vary widely between different patients in identical situations and in one study in  
47 which patients were asked a single question about how satisfied overall they were with their  
48 primary care practice, only 4.6% of the variance in their satisfaction ratings was a result of  
49  
50  
51  
52  
53  
54  
55  
56  
57  
58  
59  
60

1  
2  
3 differences between practices<sup>34</sup>. Unlike patient experience data, improvements in patient  
4 satisfaction data are also not associated with improvements in care quality<sup>35</sup>.  
5  
6

7  
8 The qualitative studies also included small, selected groups of participants whose expressed  
9 views are likely to be affected by both recall bias (systematic errors due to inaccuracy of  
10 recollections about NHS Health Checks) and social desirability bias (the tendency of  
11 interviewees to give responses that they think might be viewed favourably by the  
12 interviewer). By virtue of the fact that they have chosen to take part in medical research the  
13 participants may also be more interested in their health than the general population so their  
14 views may not reflect the full range of views and experiences of those attending NHS Health  
15 Checks.  
16  
17  
18  
19  
20  
21

### 22 23 **Comparison with existing literature**

24 The high levels of satisfaction reported are consistent with those reported for other NHS  
25 services, for example the General Practice Patient Survey in which the median overall  
26 satisfaction score was 86.2<sup>6</sup>. The discrepancy between the very high levels of reported  
27 satisfaction in surveys and the more negative comments made in face-to-face interviews is  
28 also consistent with previous research in other areas of health care. For example, studies have  
29 found that positive survey responses can mask important negative dimensions which patients  
30 subsequently express qualitatively<sup>36-38</sup> and that patients often give positive satisfaction  
31 ratings even in the context of a negative experience where they believe the poor care is not  
32 under the direct control of the person they are evaluating<sup>39</sup>. The interpretation of 'good'  
33 absolute patient feedback scores should, therefore, not lead to complacency and the  
34 conclusion that improvements need not be considered.  
35  
36  
37  
38  
39  
40  
41  
42  
43

44 The challenges of communicating risk are also well known<sup>40</sup> and the finding that knowing the  
45 CVD risk score was not sufficient to motivate behaviour change is consistent with guidance  
46 from the National Institute for Health and Clinical Excellence (NICE) on behaviour change<sup>41</sup>  
47 and previous systematic reviews<sup>42,43</sup>.  
48  
49  
50  
51

### 52 53 **Implications for clinicians, policymakers and future research**

54 Whilst participants were generally very supportive of the NHS Health Check programme and  
55 examples of behaviour change were reported, this study highlights a number of areas where  
56 improvements could be made. In particular, the finding that a number of patients were  
57  
58  
59  
60



1  
2  
3 unaware of the programme or had misunderstood the extent and purpose of the NHS Health  
4 Check suggests that more proactive communications may be needed to raise awareness of the  
5 programme overall and that patients need additional clarity about the programme when being  
6 invited. The expectation that the NHS Health Check would be a more general health check  
7 also raises questions about whether the programme should be expanded to cover other areas  
8 of health. The lack of clarity around follow-up and reports that participants would have liked  
9 their healthcare professionals to be more pro-active in supporting them to make lifestyle  
10 changes additionally suggests that there are potential missed opportunities to support  
11 behaviour change. This may be in part due to a lack of appropriate services to refer patients to  
12 but may also reflect a need for additional training for those delivering the NHS Health Check.  
13 Finally, the confusion around the CVD risk score amongst patients highlights the potential  
14 limitations of relying on the risk score alone as a trigger for facilitating behaviour change  
15 within NHS Health Checks and the need for adequate training and time for healthcare  
16 professionals to help patients understand their risk in line with best practice guidance<sup>44,45</sup>.  
17 Further research is also needed to determine whether different communication strategies,  
18 such as heart age<sup>46</sup>, improve understanding and subsequent behaviour change.  
19  
20  
21  
22  
23  
24  
25  
26  
27  
28  
29  
30

### 31 **ACKNOWLEDGEMENTS**

32  
33 We thank our patient and public representatives Kathryn Lawrence and Chris Robertson for  
34 providing helpful comments on the findings and the NHS Health Checks Expert Scientific  
35 and Clinical Advisory Panel working group for providing us with the initial literature search  
36 conducted by Public Health England. We would also like to thank Anna Knack, Research  
37 Assistant at RAND Europe, for her excellent research support, and Emma Pitchforth for her  
38 helpful comments on our analysis.  
39  
40  
41  
42  
43  
44

### 45 **Contributors**

46 JUS developed the protocol, screened articles for inclusion, extracted and synthesised the  
47 quantitative and qualitative data, interpreted the findings and wrote the first draft of the  
48 manuscript. EH screened articles for inclusion, extracted and synthesised the qualitative data,  
49 interpreted the findings and critically revised the manuscript. CMA extracted and synthesised  
50 the qualitative data and critically revised the manuscript. AM screened articles for inclusion,  
51 interpreted the findings and critically revised the manuscript. CS, CM, FW, SG and JM  
52 developed the protocol, interpreted the findings and critically revised the manuscript.  
53  
54  
55  
56  
57  
58  
59  
60



### Funding

This work was funded by a grant from Public Health England. JUS was funded by an NIHR Clinical Lectureship and FW by an NIHR Clinician Scientist award. The views expressed in this publication are those of the authors and not necessarily those of the NHS, the NIHR or the Department of Health.

All researchers were independent of the funding body and the funder had no role in data collection, analysis and interpretation of data; in the writing of the report; or decision to submit the article for publication.

### Data sharing

All data are available from the reports or authors of the primary research. No additional data is available.

### Competing Interests

All authors have completed the Unified Competing Interest form at [www.icmje.org/coi\\_disclosure.pdf](http://www.icmje.org/coi_disclosure.pdf) (available on request from the corresponding author) and declare that (1) they have no support from or relationships with companies that might have an interest in the submitted work in the previous 3 years; (2) their spouses, partners, or children have no financial relationships that may be relevant to the submitted work; and (3) they have no non-financial interests that may be relevant to the submitted work.

The corresponding author has the right to grant on behalf of all authors and does grant on behalf of all authors, an exclusive licence on a worldwide basis to the BMJ Publishing Group Ltd and its Licensees to permit this article (if accepted) to be published in BMJ editions and any other BMJ PGL products and sub-licences to exploit all subsidiary rights, as set out in our licence (<http://resources.bmj.com/bmj/authors/checklists-forms/licence-for-publication>).

All authors had full access to all of the data in the study and can take responsibility for the integrity of the data and the accuracy of the data analysis

The corresponding author affirms that the manuscript is an honest, accurate, and transparent account of the study being reported; that no important aspects of the study have been omitted;

and that any discrepancies from the study as planned (and, if relevant, registered) have been explained.

## FIGURE LEGENDS

Figure 1. PRISMA flow diagram

## REFERENCES

- 1 Department of Health. Economic Modelling for Vascular Checks. 2008. [www.healthcheck.nhs.uk/document.php?o=225](http://www.healthcheck.nhs.uk/document.php?o=225)
- 2 Professor the Lord Darzi. High quality care for all: NHS Next Stage Review final report. 2008. [http://webarchive.nationalarchives.gov.uk/20130107105354/http://www.dh.gov.uk/en/Publicationsandstatistics/Publications/PublicationsPolicyAndGuidance/DH\\_085825](http://webarchive.nationalarchives.gov.uk/20130107105354/http://www.dh.gov.uk/en/Publicationsandstatistics/Publications/PublicationsPolicyAndGuidance/DH_085825)
- 3 Institute of Medicine. Crossing the quality chasm: a new health system for the 21st century. 2001. [https://www.nationalacademies.org/hmd/~/media/Files/ReportFiles/2001/Crossing-the-Quality-Chasm/Quality Chasm 2001 report brief.pdf](https://www.nationalacademies.org/hmd/~/media/Files/ReportFiles/2001/Crossing-the-Quality-Chasm/Quality%20Chasm%202001%20report%20brief.pdf)
- 4 Campbell SM, Roland MO, Buetow SA. Defining quality of care. *Soc Sci Med* 2000;**51**:1611–25.
- 5 Doyle C, Lennox L, Bell D. A systematic review of evidence on the links between patient experience and clinical safety and effectiveness. *BMJ Open* 2013;**3**:1–18.
- 6 Llanwarne NR, Abel GA, Elliott MN, *et al*. Relationship between clinical quality and patient experience: analysis of data from the english quality and outcomes framework and the National GP Patient Survey. *Ann Fam Med* 2013;**11**:467–72.
- 7 Critical Appraisal Skills Programme (CASP) Checklists. <http://www.casp-uk.net/casp-tools-checklists>
- 8 Thomas J, Harden A. Methods for the thematic synthesis of qualitative research in systematic reviews. *BMC Med Res Methodol* 2008;**8**:45.
- 9 Krska J, du Plessis R, Chellaswamy H. Views and experiences of the NHS Health Check provided by general medical practices: cross-sectional survey in high-risk patients. *J Public Health (Bangkok)* 2015;**37**:210–7.
- 10 Baker C, Loughren EA, Crone D, *et al*. Patients' perceptions of a NHS Health Check in the primary care setting. *Qual Prim Care* 2014;**22**:232–7.
- 11 Cowper. The NHS Health Check Leadership Forum : Summary and Findings. *NHS Heal Check Leadersh Forum* 2013.

- 1  
2  
3 12 Trivedy C, Vlaev I, Seymour R, *et al.* An evaluation of opportunistic health checks at  
4 cricket matches: the Boundaries for Life initiative. *Sport Soc* 2016;**437**:1–9.  
5  
6 13 NHS Greenwich. Evaluation of NHS Health Check PLUS Community Outreach  
7 Programme in Greenwich. 2011;:1–61.  
8  
9 14 LGA - East Riding. Public health transformation twenty months on: adding value to  
10 tackle local health needs. Published Online First:  
11 2015.[http://www.local.gov.uk/documents/10180/6869714/L15\\_15+Public+health+tran](http://www.local.gov.uk/documents/10180/6869714/L15_15+Public+health+transformation+twenty+months+on_WEB_39693.pdf/7bb8060e-9a7b-4b85-8099-e854be74cfb5)  
12 [sformation+twenty+months+on\\_WEB\\_39693.pdf/7bb8060e-9a7b-4b85-8099-](http://www.local.gov.uk/documents/10180/6869714/L15_15+Public+health+transformation+twenty+months+on_WEB_39693.pdf/7bb8060e-9a7b-4b85-8099-e854be74cfb5)  
13 [e854be74cfb5](http://www.local.gov.uk/documents/10180/6869714/L15_15+Public+health+transformation+twenty+months+on_WEB_39693.pdf/7bb8060e-9a7b-4b85-8099-e854be74cfb5)  
14  
15 15 Health Diagnostics. A Picture Of Health NHS Health Checks Case Study : Case study  
16 Introduction : National inequalities in health check provision. 2014.  
17  
18 16 Taylor J, Krska J, MacKridge A. A community pharmacy-based cardiovascular  
19 screening service: Views of service users and the public. *Int J Pharm Pract*  
20 2012;**20**:277–84.  
21  
22 17 Corlett SA, Krska J. Evaluation of NHS Health Checks provided by community  
23 pharmacies. *J Public Health (Bangkok)* 2015;:1–8.  
24  
25 18 Ismail H, Atkin K. The NHS Health Check programme: Insights from a qualitative  
26 study of patients. *Heal Expect* 2015;**19**:345–55.  
27  
28 19 Jenkinson CE, Asprey A, Clark CE, *et al.* Patients' willingness to attend the NHS  
29 cardiovascular health checks in primary care: a qualitative interview study. *BMC Fam*  
30 *Pract* 2015;**16**:33.  
31  
32 20 McNaughton RJ, Oswald NT, Shucksmith JS, *et al.* Making a success of providing  
33 NHS Health Checks in community pharmacies across the Tees Valley: a qualitative  
34 study. *BMC Health Serv Res* 2011;**11**:1–7.  
35  
36 21 Perry C, Thurston M, Alford S, *et al.* The NHS health check programme in England: a  
37 qualitative study. *Health Promot Int* 2014;**31**:106–15.  
38  
39 22 Riley R, Coghill N, Montgomery A, *et al.* Experiences of patients and healthcare  
40 professionals of NHS cardiovascular health checks: A qualitative study. *J Public*  
41 *Health (Bangkok)* 2015;**38**:543–51.  
42  
43 23 Riley R, Coghill N, Montgomery A, *et al.* The provision of NHS health checks in a  
44 community setting: an ethnographic account. *BMC Health Serv Res* 2015;**15**:1–10.  
45  
46 24 Shaw RL, Pattison HM, Holland C, *et al.* Be SMART: examining the experience of  
47 implementing the NHS Health Check in UK primary care. *BMC Fam Pract* 2015;**16**:1.  
48  
49 25 Alford S, Catherine P. Knowsley at Heart community NHS health checks : Behaviour  
50  
51  
52  
53  
54  
55  
56  
57  
58  
59  
60

- change evaluation.  
2010.<http://chesterrep.openrepository.com/cdr/handle/10034/118071>
- 26 Chipchase L, Hill P, Waterall J. An insight into the NHS Health Check Programme in Birmingham; Summar report. 2011.
- 27 Oswald N, Mcnaughton R, Watson P, *et al.* Tees Vascular Assessment Programme Evaluation. 2010.
- 28 Strutt E. *Patient-centred care: patients' experiences of and responses to the National Health Service (NHS) Health Check programme in general practice.* 2011.<http://etheses.dur.ac.uk/3246>
- 29 McNaughton RJ, Shucksmith J. Reasons for (non)compliance with intervention following identification of 'high-risk' status in the NHS Health Check programme. *J Public Heal (United Kingdom)* 2015;**37**:218–25.
- 30 Britten N, Campbell R, Pope C, *et al.* Using meta ethnography to synthesise qualitative research: a worked example. *J Health Serv Res Policy* 2002;**7**:209–15.
- 31 Groves RM, Peytcheva E. The impact of nonresponse rates on nonresponse bias: A meta-analysis. *Public Opin Q* 2008;**72**:167–89.
- 32 Davern M. Nonresponse rates are a problematic indicator of nonresponse bias in survey research. *Health Serv Res* 2013;**48**:905–12.
- 33 Cleary P. Satisfaction may not suffice!: a commentary on a patient's perspective. *Int J Tech Assess Heal Care* 1998;**14**:35–7.
- 34 Salisbury C, Wallace M, Montgomery AA. Patients' experience and satisfaction in primary care: secondary analysis using multilevel modelling. *BMJ* 2010;**341**:c5004–c5004.
- 35 Sitzia J, Wood N. Patient satisfaction: a review of issues and concepts. *Soc Sci Med* 1997;**45**:1829–43.
- 36 Roland M, Campbell J, Burt J. Improving patient experience in primary care: a multi-method programme of research on the measurement and improvement of patient experience. *NIHR PGfAR*;:In press.
- 37 Dougall A, Russell A, Rubin G, *et al.* Rethinking patient satisfaction: patient experiences of an open access flexible sigmoidoscopy service. *Soc Sci Med* 2000;**50**:53–62.
- 38 Burt J, Newbould J, Abel G, *et al.* Investigating the meaning of 'good' or 'very good' patient evaluations of care in English general practice: a mixed methods study. *BMJ Open* 2017;:In press.

- 1  
2  
3 39 Schneider H, Palmer N. Getting to the truth? Researching user views of primary health  
4 care. *Health Policy Plan* 2002;**17**:32–41.  
5  
6 40 Waldron C-A, van der Weijden T, Ludt S, *et al*. What are effective strategies to  
7 communicate cardiovascular risk information to patients? A systematic review. *Patient*  
8 *Educ Couns* 2011;**82**:169–81.  
9  
10 41 National Institute for Health and Care Excellence. Public Health Guideline - Behaviour  
11 change: individual approaches. 2014. [www.nice.org.uk/guidance/ph49](http://www.nice.org.uk/guidance/ph49)  
12  
13 42 Willis A, Davies M, Yates T, *et al*. Primary prevention of cardiovascular disease using  
14 validated risk scores: a systematic review. *J R Soc Med* 2012;**105**:348–56.  
15  
16 43 Usher-Smith JA, Silarova B, Schuit E, *et al*. Impact of provision of cardiovascular  
17 disease risk estimates to healthcare professionals and patients: a systematic review.  
18 *BMJ Open* 2015;**5**:e008717.  
19  
20 44 Zipkin DA, Umscheid CA, Keating NL, *et al*. Evidence-based risk communication: a  
21 systematic review. *Ann Intern Med* 2014;**161**:270–80.  
22  
23 45 Fagerlin A, Zikmund-Fisher BJ, Ubel PA. Helping patients decide: Ten steps to better  
24 risk communication. *J Natl Cancer Inst* 2011;**103**:1436–43.  
25  
26 46 Wells S, Kerr A, Eadie S, *et al*. ‘Your Heart Forecast’: a new approach for describing  
27 and communicating cardiovascular risk? *Heart* 2010;**96**:708–13.  
28  
29  
30  
31  
32  
33  
34  
35  
36  
37  
38  
39  
40  
41  
42  
43  
44  
45  
46  
47  
48  
49  
50  
51  
52  
53  
54  
55  
56  
57  
58  
59  
60

**Table 1.** Features of and findings from studies reporting results of participant satisfaction questionnaires

| Study/ year                         | Type of article   | Setting                                                                                        | n         | Recruitment                                                                                                                                                           | Response rate (%) | Participant satisfaction                                                                                                                                                                                                                                                                                                                                                     | Overall quality |
|-------------------------------------|-------------------|------------------------------------------------------------------------------------------------|-----------|-----------------------------------------------------------------------------------------------------------------------------------------------------------------------|-------------------|------------------------------------------------------------------------------------------------------------------------------------------------------------------------------------------------------------------------------------------------------------------------------------------------------------------------------------------------------------------------------|-----------------|
| Baker 2014 <sup>10</sup>            | Journal article   | 83 general practices                                                                           | 1,011     | Survey sent to all patients who had completed an NHS Health Check within a 2-month period                                                                             | 43                | 91.7% rated the overall experience highly<br>90.2% felt it was worth attending                                                                                                                                                                                                                                                                                               | High            |
| Corlett 2015 <sup>17</sup>          | Journal article   | Pharmacy-based NHS Health Checks                                                               | 190       | Survey sent to all those who had attended an NHS Health Check within a 4 week period                                                                                  | 35                | Almost all viewed their experience positively<br>92% felt they were given enough time<br>94% were able to ask all their questions<br>3% had unanswered questions<br>99% understood everything                                                                                                                                                                                | High            |
| Cowper 2013 <sup>11</sup>           | Case study        | NHS Health Checks in County Durham                                                             | 483       | No details provided                                                                                                                                                   | Not given         | 82.2% were very satisfied<br>99.6% would recommend to others                                                                                                                                                                                                                                                                                                                 | Low             |
| Krska 2015 <sup>9</sup>             | Journal article   | 16 general practices in North West England                                                     | 434       | All patients with estimated 10-year CVD risk > 20% from the 16 practices were sent a postal survey regardless of whether they had attended an NHS Health Check or not | 23.4              | 85.6% felt they had benefited<br>89.6% felt they were given enough time<br>90.2% were able to ask all their questions<br>93.6% felt comfortable discussing their lifestyle<br>91.9% understood everything discussed<br>13.5% would have liked more support changing lifestyle<br>7.4% had concerns that had not been dealt with<br>92% rated experience as good or very good | High            |
| LGA – East Riding <sup>14</sup>     | Case study        | Outreach NHS Health Check clinics at leisure centres, community centres and workplace settings | Not given | No details provided                                                                                                                                                   | Not given         | 97% satisfied or very satisfied overall<br>90% likely or very likely to return if invited back<br>95% satisfied or very satisfied                                                                                                                                                                                                                                            | Low             |
| NHS Greenwich <sup>13</sup>         | Evaluation report | Outreach clinics                                                                               | 540       | Questionnaire distributed at community NHS Health Check venues                                                                                                        | Not given         | 97% satisfied or very satisfied overall<br>90% likely or very likely to return if invited back                                                                                                                                                                                                                                                                               | Medium          |
| NHS Greenwich <sup>13</sup>         | Evaluation report | Outreach clinics                                                                               | 72        | Questionnaire distributed at community NHS Health Check venues                                                                                                        | Not given         | 95% satisfied or very satisfied                                                                                                                                                                                                                                                                                                                                              | Medium          |
| ‘A picture of Health’ <sup>15</sup> | Case study        | General practice-based pilot of point-of-care NHS Health Checks in Tyne and Wear               | 281       | No details provided                                                                                                                                                   | Not given         | ‘High levels’ of satisfaction<br>78% likely to recommend to others                                                                                                                                                                                                                                                                                                           | Low             |
| Taylor 2012 <sup>16</sup>           | Journal article   | Pharmacy-based NHS Health Checks                                                               | 97        | Pharmacists gave invitation packs to all those who attended an NHS Health Check during the first six months                                                           | 37.4              | Almost all reported a positive experience<br>99% felt they had benefited<br>99.7% felt they were given enough time<br>99% felt comfortable discussing their lifestyle<br>10.8% had unanswered questions                                                                                                                                                                      | High            |
| Trivedy 2016 <sup>12</sup>          | Journal article   | Outreach NHS Health Check clinics at cricket grounds                                           | 513       | Participants were asked to complete an anonymous questionnaire immediately after their NHS Health Check                                                               | Not given         | 83% rated their experience as excellent<br>100% would recommend to others                                                                                                                                                                                                                                                                                                    | Medium          |

**Table 2.** Features of qualitative studies describing patient experiences of NHS Health Checks

| Author, year                        | Type of report    | Study period | Location of study         | Setting of NHS Health Check | Data collection method                                               | n                                                        | Method of recruitment to study                                                                                                                                                                               | Participant characteristics                                                                           | Overall quality |
|-------------------------------------|-------------------|--------------|---------------------------|-----------------------------|----------------------------------------------------------------------|----------------------------------------------------------|--------------------------------------------------------------------------------------------------------------------------------------------------------------------------------------------------------------|-------------------------------------------------------------------------------------------------------|-----------------|
| Alford 2010 <sup>25</sup>           | Evaluation report | Not given    | Knowsley                  | Community                   | Interviews and focus groups                                          | 36                                                       | No details given                                                                                                                                                                                             | 19 female, 17 male<br>13 high risk score, 23 low risk score                                           | Medium          |
| Baker 2014 <sup>10</sup>            | Journal article   | 2012         | Gloucester                | 83 general practices        | Content analysis of cross-sectional survey                           | 1,011 (43%)                                              | Survey sent to all patients who had completed an NHS Health Check within a 2 month period                                                                                                                    | 55.2% female<br>19% 56-60 years<br>10.8% 40-45 years<br>96% white British                             | High            |
| Chipchase 2011 <sup>26</sup>        | Report            | 2011         | East and North Birmingham | 2 general practices         | Face-to-face semi-structured interviews                              | 10                                                       | Attendees to NHS Health Checks in the first two weeks of February 2011 received a recruitment letter                                                                                                         | 8 female, 2 male                                                                                      | High            |
| Corlett 2015 <sup>17</sup>          | Journal article   | 2013         | London                    | 4 pharmacies                | Telephone interviews with sample of survey respondents               | 19                                                       | Invitation for a semi-structured telephone interview included with survey sent to all those who had attended an NHS Health Check within a 4 week period                                                      | Not given                                                                                             | Medium          |
| Greenwich 2011 <sup>13</sup>        | Report            | 2011         | Greenwich                 | Community                   | Open ended questionnaire, focus groups and in-depth phone interviews | 612 survey responses<br>4 focus groups and 31 interviews | Recruited from community outreach services providing NHS Health Checks                                                                                                                                       | Ethnic minority participants: 42% female                                                              | Medium          |
| Ismail and Atkin 2015 <sup>18</sup> | Journal article   | Not given    | Not specified             | General practices           | Semi-structured interviews                                           | 45 baseline<br>38 follow-up                              | Purposive sampling from a list provided by 5 participating general practices                                                                                                                                 | 21 female, 24 male.<br>Average age: 58.<br>Ethnicity: 37 White, 5 South Asian and 3 African Caribbean | High            |
| Jenkinson 2015 <sup>19</sup>        | Journal article   | 2013         | Torbay                    | 4 general practices         | Telephone or face-to-face interviews                                 | 17                                                       | Letters of invitation sent to a random sample identified by general practices from lists stratified by age and gender of those who had not responded to an invitation to an NHS Health Check within 4 weeks. | 12 females, 5 males<br>6 employed, 1 unemployed,<br>10 retired                                        | High            |
| Krska 2015 <sup>9</sup>             | Journal           | 2011         | Sefton, an                | 16 general                  | Postal survey                                                        | 434                                                      | All patients with estimated 10 year                                                                                                                                                                          | 19% female                                                                                            | Medium          |



| Author, year                  | Type of report    | Study period | Location of study                             | Setting of NHS Health Check     | Data collection method                                | n       | Method of recruitment to study                                                                                                                                                                                                                                                                                                           | Participant characteristics                                                                                                                                                   | Overall quality |
|-------------------------------|-------------------|--------------|-----------------------------------------------|---------------------------------|-------------------------------------------------------|---------|------------------------------------------------------------------------------------------------------------------------------------------------------------------------------------------------------------------------------------------------------------------------------------------------------------------------------------------|-------------------------------------------------------------------------------------------------------------------------------------------------------------------------------|-----------------|
|                               | article           |              | area of North West England                    | practices                       | with free text responses                              | (23.4%) | CVD risk > 20% from the 16 practices were sent a postal survey regardless of whether they had attended an NHS Health Check or not                                                                                                                                                                                                        | 68.2% over 65<br>99.5% white<br>7.7% highest quintile of deprivation<br>13.7% lowest quintile                                                                                 |                 |
| McNaughton 2015 <sup>29</sup> | Journal article   | 2009-12      | North East of England (non-specific location) | 5 general practices             | Semi-structured interviews                            | 29      | Invitations to patients from five general practices who had received an NHS Health Check and had an estimated 10 year CVD risk >20%                                                                                                                                                                                                      | 10 females, 19 males<br>24 over 65 years<br>13 in least deprived quintile                                                                                                     | High            |
| Oswald 2010 <sup>27</sup>     | Evaluation report | 2009 - 2010  | Teesside                                      | General practices or pharmacies | Semi-structured interviews                            | 8       | Invited by general practices or pharmacies or from a list of patients who had attended an NHS Health Check and agreed to take part in the service evaluation                                                                                                                                                                             | 6 had attended general practices and 2 pharmacies                                                                                                                             | Medium          |
| Perry 2014 <sup>21</sup>      | Journal article   | 2010         | Knowsley                                      | Community                       | Interviews and focus groups                           | 36      | Letter or telephone invitation to all 38 people who were at high risk of CVD and had attended an NHS Health Check in the past 12-18 months were invited. The remaining attendees at low risk of CVD were purposively sampled for gender, age, risk score. Participants were recruited via their attendance of community outreach events. | 3 focus groups: 1 for high risk scores (6 males), 2 for low risk scores (17 females and 7 males)<br>6 semi-structured interviews (2 females and 4 males with high risk score) | High            |
| Riley 2015 <sup>23</sup>      | Journal article   | 2013         | Bristol inner-city                            | Community                       | Semi-structured interviews                            | 16      | Purposive sampling from those identified through a search of patient records for patients who had undertaken an NHS Health Check within the previous 6 months                                                                                                                                                                            | 7 females, 9 males<br>All from black and minority ethnic populations                                                                                                          | High            |
| Riley 2015 <sup>22</sup>      | Journal article   | 2013-14      | Bristol                                       | General practices               | Face-to-face and telephone semi-structured interviews | 28      | Patients who had attended an NHS Health Check were invited by practice managers or lead clinicians                                                                                                                                                                                                                                       | 23 White British<br>11 most deprived quintile<br>11 high (>20%) CVD risk                                                                                                      | High            |
| Shaw 2015 <sup>24</sup>       | Journal article   | 2010-11      | Birmingham and Black Country                  | General practices and community | Semi-structured interviews                            | 23      | Invitation letters or telephone                                                                                                                                                                                                                                                                                                          | High black and minority ethnic population and high levels of deprivation                                                                                                      | High            |
| Strutt 2011 <sup>28</sup>     | Masters thesis    | 2010         | Darlington, Co. Durham, UK                    | 2 general practices             | Semi-structured face-to-face interviews               | 16      |                                                                                                                                                                                                                                                                                                                                          | 7 females, 9 males<br>White, South-Asian, and Middle Eastern                                                                                                                  | High            |



**Table 3.** Studies contributing to each of the qualitative themes

|                                     | Unmet expectations | Limited understanding of the risk score | Preference for better information | Potential trigger for behaviour change | Confusion around follow-up |
|-------------------------------------|--------------------|-----------------------------------------|-----------------------------------|----------------------------------------|----------------------------|
| Alford 2010 <sup>25</sup>           |                    |                                         | •                                 | •                                      | •                          |
| Baker 2014 <sup>10</sup>            | •                  | •                                       | •                                 | •                                      |                            |
| Chipchase 2011 <sup>26</sup>        | •                  | •                                       | •                                 | •                                      |                            |
| Corlett 2015 <sup>17</sup>          |                    | •                                       | •                                 | •                                      |                            |
| Greenwich 2011 <sup>13</sup>        |                    |                                         | •                                 | •                                      | •                          |
| Ismail and Atkin 2015 <sup>18</sup> | •                  | •                                       |                                   | •                                      | •                          |
| Jenkinson 2015 <sup>19</sup>        |                    | •                                       |                                   |                                        |                            |
| Krska 2015 <sup>9</sup>             | •                  | •                                       |                                   |                                        |                            |
| McNaughton 2015 <sup>29</sup>       |                    |                                         | •                                 | •                                      |                            |
| Oswald 2010 <sup>27</sup>           | •                  |                                         |                                   |                                        | •                          |
| Perry 2014 <sup>21</sup>            |                    | •                                       | •                                 | •                                      |                            |
| Riley 2015 <sup>23</sup>            |                    | • (a)                                   | •                                 | •                                      |                            |
| Riley 2015 <sup>22</sup>            | • (b)              |                                         |                                   |                                        |                            |
| Shaw 2015 <sup>24</sup>             |                    | •                                       | •                                 | •                                      | •                          |
| Strutt 2011 <sup>28</sup>           | •                  | •                                       | •                                 | •                                      |                            |

**Box 1.** Reasons provided by participants for not making lifestyle changes

- Older participants feeling that making changes to their lifestyle was unnecessary<sup>29</sup>
- Healthy eating information was too generic<sup>29</sup>
- Guidance they had been given was likely to be subject to change<sup>29</sup>
- Co-morbidities which made physical activity difficult<sup>29</sup>
- Psychosocial circumstances, e.g. bereavement, stress or socio-economic barriers, such as shift work or unemployment<sup>21,22</sup>
- Having previously been offered a behaviour intervention strategy<sup>18</sup>
- Cost of eating fresh fruit and vegetables<sup>18</sup>
- Difficulty incorporating changes into their daily lives<sup>21</sup>
- Underlying medical conditions<sup>21</sup>

Existing searches by Public Health England

BMJ Open

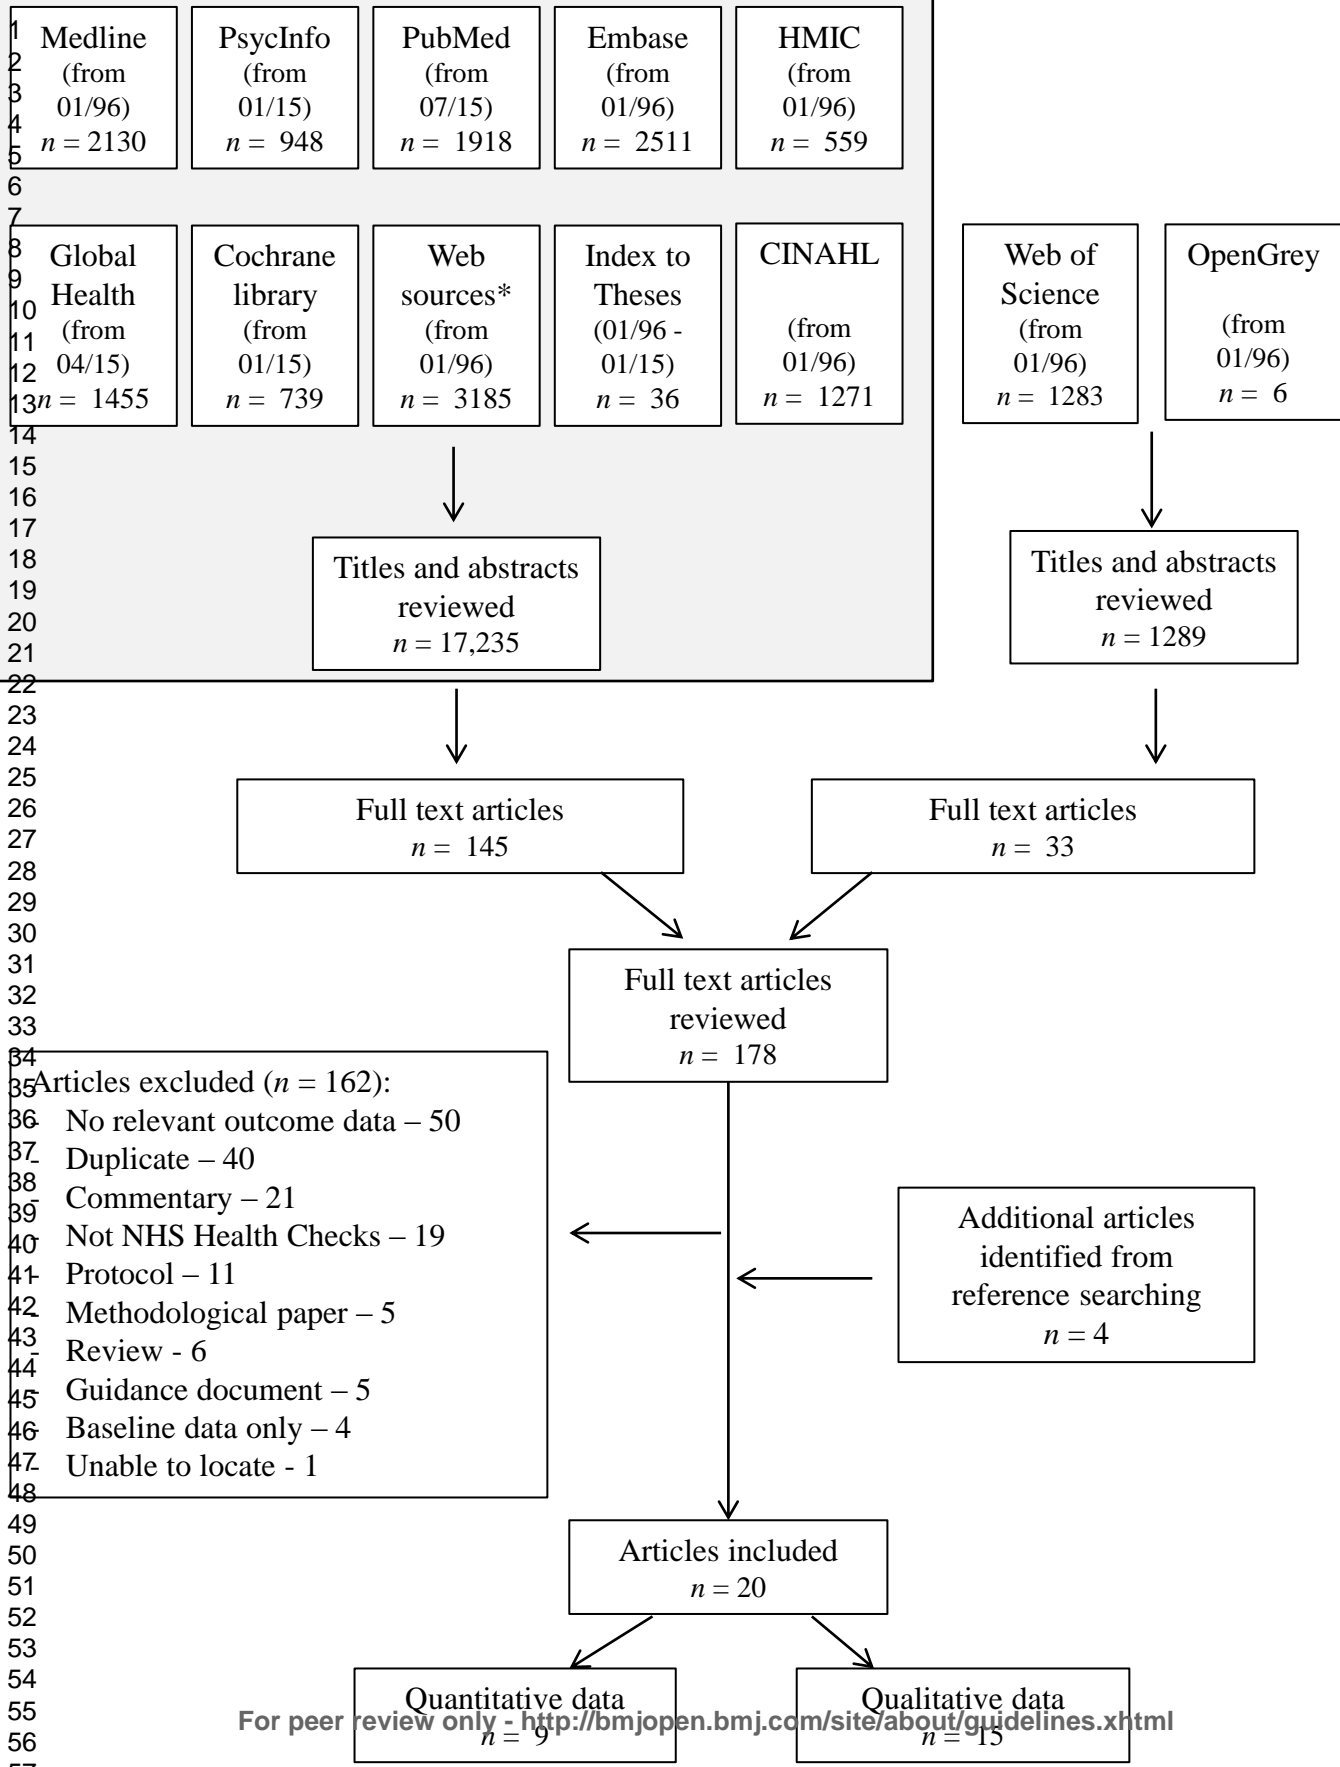

1  
2  
3 **Appendix 1 – Search strategies**  
4  
5

| Database     | Search strategy                                                                                                                                                                                                                                                                                                                                                                                                                                                                                                                                                                                                                                              |
|--------------|--------------------------------------------------------------------------------------------------------------------------------------------------------------------------------------------------------------------------------------------------------------------------------------------------------------------------------------------------------------------------------------------------------------------------------------------------------------------------------------------------------------------------------------------------------------------------------------------------------------------------------------------------------------|
| Ovid Medline | 1. health check*.tw.<br>2. (diabetes adj3 screen*).tw.<br>3. (cardiovascular adj3 screen*).tw.<br>4. (population adj2 screen*).tw.<br>5. (risk factor adj3 screen*).tw.<br>6. (opportunistic adj3 screen*).tw.<br>7. medical check*.tw.<br>8. general check*.tw.<br>9. periodic health exam*.tw.<br>10. annual exam*.tw.<br>11. annual review*.tw.<br>12. NHSHC.tw.<br>13. 1 or 2 or 3 or 4 or 5 or 6 or 7 or 8 or 9 or 10 or 11 or 12<br>14. cardiovascular adj3 prevention.tw.<br>15. (primary care or general practice or primary healthcare).tw<br>16. 14 and 15<br>17. Cardiovascular Diseases/ AND Primary Prevention/<br>18. 16 or 17<br>19. 13 or 18 |
| PubMed       | 1. health check*<br>2. diabetes screen*<br>3. cardiovascular screen*<br>4. population screen*<br>5. risk factor screen*<br>6. opportunistic screen*<br>7. medical check*<br>8. general check*<br>9. periodic health exam*<br>10. annual exam*<br>11. annual review*<br>12. NHSHC<br>13. 1 or 2 or 3 or 4 or 5 or 6 or 7 or 8 or 9 or 10 or 11 or 12<br>14. Cardiovascular Diseases AND Primary Prevention[MeSH Terms]<br>15. "primary care"[Text Word] OR "general practice"[Text Word] OR<br>"primary healthcare"[Text Word])<br>16. (cardiovascular[Text Word] AND prevention[Text Word])<br>17. #15 and #16<br>18. #14 or #17<br>19. #13 or #18           |
| Ovid Embase  | 1. health check*.tw.<br>2. (diabetes adj3 screen*).tw.<br>3. (cardiovascular adj3 screen*).tw.<br>4. (population adj2 screen*).tw.                                                                                                                                                                                                                                                                                                                                                                                                                                                                                                                           |

5. (risk factor adj3 screen\*).tw.
6. (opportunistic adj3 screen\*).tw.
7. medical check\*.tw.
8. general check\*.tw.
9. periodic health exam\*.tw.
10. annual exam\*.tw.
11. annual review\*.tw.
12. NHSHC.tw.
13. periodic medical examination/
14. 1 or 2 or 3 or 4 or 5 or 6 or 7 or 8 or 9 or 10 or 11 or 12 or 13
15. cardiovascular adj3 prevention.tw.
16. (primary care or general practice or primary healthcare).tw
17. 15 and 16
18. cardiovascular disease/ AND primary prevention/
19. 17 or 18
20. 14 or 19

## Ovid HMIC

- 1 "health check\*".af.
- 2 health checks/
- 3 (cardiovascular or vascular or heart or diabetes or stroke).af.
- 4 (screen\* or risk).af.
- 5 3 AND 4
- 6 1 OR 2 or 5
- 7 cardiovascular adj3 prevention.tw.
- 8 (primary care or general practice or primary healthcare).tw
- 9 7 and 8
- 10 Cardiovascular diseases/ AND exp preventive medicine/
- 11 9 or 10
- 12 6 or 11

EBSCO  
CINAHL

- S10 S1 OR S2 OR S9  
 S9 S5 OR S8  
 S8 S6 AND S7  
 S7 (MH "Preventive Health Care+")  
 S6 (MH "Cardiovascular Diseases+")  
 S5 S3 AND S4  
 S4 "primary care" or "general practice" or "primary healthcare"  
 S3 TX cardiovascular N3 prevention  
 S2 (diabetes N3 screen\*) OR (cardiovascular N3 screen\*) OR  
 (population N2 screen\*) OR (risk factor N3 screen\*) OR (opportunistic  
 N3 screen\*) OR "medical check\*" OR "general check\*" OR "periodic  
 health exam\*" OR "annual exam\*" OR "annual review\*" OR NHSHC  
 S1 health check\*

EBSCO Global  
Health

- S10 S6 OR S19 OR S3 Limiters - Publication Year: 2016  
 S9 S7 AND S8  
 S8 DE "preventive medicine"  
 S7 DE "cardiovascular diseases"  
 S6 S4 AND S5  
 S5 "primary care" or "general practice" or "primary healthcare"

1  
2  
3  
4  
5  
6  
7  
8  
9  
10  
11  
12  
13  
14  
15  
16  
17  
18  
19  
20  
21  
22  
23  
24  
25  
26  
27  
28  
29  
30  
31  
32  
33  
34  
35  
36  
37  
38  
39  
40  
41  
42  
43  
44  
45  
46  
47  
48  
49  
50  
51  
52  
53  
54  
55  
56  
57  
58  
59  
60

S4 TX cardiovascular N3 prevention  
S3 S1 OR S2  
S2 (diabetes N3 screen\*) OR (cardiovascular N3 screen\*) OR  
(population N2 screen\*) OR (risk factor N3 screen\*) OR (opportunistic  
N3 screen\*) OR "medical check\*" OR "general check\*" OR "periodic  
health exam\*" OR "annual exam\*" OR "annual review\*" OR NHSHC  
S1 health check\*

HDAS PsycInfo 1 "health check\*".af.  
2 PHYSICAL EXAMINATION/  
3 HEALTH SCREENING/  
4 "diabetes screen\*".af  
5 "cardiovascular screen\*".af  
6 "population screen\*".af  
7 ("opportunistic\* screen\*" OR "risk factor screen\*").af  
8 ("medical check\*" OR "general check\*" OR "periodic health exam\*" OR "annual exam\*" OR "annual review\*" OR NHSHC).af  
9 1 OR 2 OR 3 OR 4 OR 5 OR 6 OR 7 OR 8  
10 cardiovascular.ti,ab  
11 prevention.ti,ab  
12 10 AND 11  
13 CARDIOVASCULAR DISORDERS/  
14 PREVENTIVE MEDICINE/  
15 13 AND 14  
16 12 OR 15  
17 9 OR 16

Web of Science, "health check\*" OR "diabetes screen\*" OR "cardiovascular screen\*" OR  
Science Citation "population screen\*" OR "risk factor screen\*" OR "Opportunistic  
Index screen\*" OR "medical check\*" OR "general check\*" OR "periodic health  
exam\*" OR "annual exam\*" OR "annual review\*" OR NHSHC  
OR  
(Cardiovascular NEAR/3 prevention) AND ("primary care" OR "general  
practice" OR "primary healthcare")  
Limit to: England, Scotland, Wales, North Ireland

Cochrane Library #1 "health check\*"  
(Wiley) #2 (diabetes next/3 screen\*) or (cardiovascular next/3 screen\*) or  
(population next/2 screen\*) or (opportunistic next/2 screen\*) or ("risk  
factor" next/3 screen\*) or "medical check\*" or "general check\*" or  
"periodic health exam\*" or "annual exam\*" or "annual review\*" or  
NHSHC  
#3 cardiovascular adj3 prevention.tw.  
#4 (primary care or general practice or primary healthcare).tw  
#5 #3 and #4  
#6 MeSH descriptor: [Cardiovascular Diseases] this term only  
#7 MeSH descriptor: [Primary Prevention] explode all trees  
#8 #6 and #7  
#9 #5 or #8  
#10 #1 or #2 or #9

1  
2  
3  
4 NHS Evidence “health check\*” OR cardiovascular prevention primary care  
5  
6 TRIP database “health check\*” OR cardiovascular prevention primary care  
7  
8 Google Scholar "nhs health check"  
9 cardiovascular “health check”  
10 cardiovascular prevention “primary care”  
11  
12 Google "nhs health check"  
13 cardiovascular prevention “primary care”  
14 cardiovascular “health check”  
15  
16  
17 Clinical “health check”  
18 trials.gov and  
19 ISRCND registry  
20  
21  
22  
23  
24  
25  
26  
27  
28  
29  
30  
31  
32  
33  
34  
35  
36  
37  
38  
39  
40  
41  
42  
43  
44  
45  
46  
47  
48  
49  
50  
51  
52  
53  
54  
55  
56  
57  
58  
59  
60

1  
2  
3  
4  
5  
6  
7  
8  
9  
10  
11  
12  
13  
14  
15  
16  
17  
18  
19  
20  
21  
22  
23  
24  
25  
26  
27  
28  
29  
30  
31  
32  
33  
34  
35  
36  
37  
38  
39  
40  
41  
42  
43  
44  
45  
46  
47  
48  
49

**Appendix 2 – Quality assessment of quantitative studies**

| Author, date                        | Study addressed a clearly focused issue | Use of an appropriate method | Recruitment | Exposure measurement | Outcome measurement | Confounding factors | Applicability to England | Overall |
|-------------------------------------|-----------------------------------------|------------------------------|-------------|----------------------|---------------------|---------------------|--------------------------|---------|
| Baker 2014                          | ●                                       | ●                            | ●           | ●                    | ●                   | ●                   | ●                        | High    |
| Corlett 2015                        | ●                                       | ●                            | ●           | ●                    | ●                   | ●                   | ●                        | High    |
| Cowper 2013                         | ●                                       | ●                            | ●           | ●                    | ●                   | ●                   | ●                        | Low     |
| Krska 2015                          | ●                                       | ●                            | ●           | ●                    | ●                   | ●                   | ●                        | High    |
| LGA – East Riding 2015              | ●                                       | ●                            | ●           | ●                    | ●                   | ●                   | ●                        | Low     |
| NHS Greenwich 'A picture of Health' | ●                                       | ●                            | ●           | ●                    | ●                   | ●                   | ●                        | Medium  |
| Taylor 2012                         | ●                                       | ●                            | ●           | ●                    | ●                   | ●                   | ●                        | High    |
| Trivedy 2016                        | ●                                       | ●                            | ●           | ●                    | ●                   | ●                   | ●                        | Medium  |

● Low ● Medium ● High

Appendix 3 – Quality assessment of qualitative studies

| Author and date       | Study addressed a clearly focused issue | Appropriateness of qualitative method | Design | Recruitment | Consideration of relationship between research and participants | Ethical issues | Rigor of data analysis | Clarity of statement of findings | Overall |
|-----------------------|-----------------------------------------|---------------------------------------|--------|-------------|-----------------------------------------------------------------|----------------|------------------------|----------------------------------|---------|
| Alford 2010           | ●                                       | ●                                     | ●      | ●           | ●                                                               | ●              | ●                      | ●                                | Medium  |
| Baker 2014            | ●                                       | ●                                     | ●      | ●           | n/a                                                             | ●              | ●                      | ●                                | High    |
| Chipchase 2011        | ●                                       | ●                                     | ●      | ●           | ●                                                               | ●              | ●                      | ●                                | High    |
| Corlett 2015          | ●                                       | ●                                     | ●      | ●           | ●                                                               | ●              | ●                      | ●                                | Medium  |
| Greenwich 2011        | ●                                       | ●                                     | ●      | ●           | ●                                                               | ●              | ●                      | ●                                | Medium  |
| Ismail and Atkin 2015 | ●                                       | ●                                     | ●      | ●           | ●                                                               | ●              | ●                      | ●                                | High    |
| Jenkinson 2015        | ●                                       | ●                                     | ●      | ●           | ●                                                               | ●              | ●                      | ●                                | High    |
| Krska 2015            | ●                                       | ●                                     | ●      | ●           | n/a                                                             | ●              | ●                      | ●                                | Medium  |
| McNaughton 2015       | ●                                       | ●                                     | ●      | ●           | ●                                                               | ●              | ●                      | ●                                | High    |
| Oswald 2010           | ●                                       | ●                                     | ●      | ●           | ●                                                               | ●              | ●                      | ●                                | Medium  |
| Perry 2014            | ●                                       | ●                                     | ●      | ●           | ●                                                               | ●              | ●                      | ●                                | High    |
| Riley 2015 (JPH)      | ●                                       | ●                                     | ●      | ●           | ●                                                               | ●              | ●                      | ●                                | High    |
| Riley 2015 (BMC HSR)  | ●                                       | ●                                     | ●      | ●           | ●                                                               | ●              | ●                      | ●                                | High    |
| Shaw 2015             | ●                                       | ●                                     | ●      | ●           | ●                                                               | ●              | ●                      | ●                                | High    |
| Strutt 2011           | ●                                       | ●                                     | ●      | ●           | ●                                                               | ●              | ●                      | ●                                | High    |

● Low ● Medium ● High



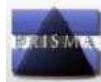

# PRISMA 2009 Checklist

| Section/topic                      | #  | Checklist item                                                                                                                                                                                                                                                                                              | Reported on page # |
|------------------------------------|----|-------------------------------------------------------------------------------------------------------------------------------------------------------------------------------------------------------------------------------------------------------------------------------------------------------------|--------------------|
| <b>TITLE</b>                       |    |                                                                                                                                                                                                                                                                                                             |                    |
| Title                              | 1  | Identify the report as a systematic review, meta-analysis, or both.                                                                                                                                                                                                                                         | 1                  |
| <b>ABSTRACT</b>                    |    |                                                                                                                                                                                                                                                                                                             |                    |
| Structured summary                 | 2  | Provide a structured summary including, as applicable: background; objectives; data sources; study eligibility criteria, participants, and interventions; study appraisal and synthesis methods; results; limitations; conclusions and implications of key findings; systematic review registration number. | 2                  |
| <b>INTRODUCTION</b>                |    |                                                                                                                                                                                                                                                                                                             |                    |
| Rationale                          | 3  | Describe the rationale for the review in the context of what is already known.                                                                                                                                                                                                                              | 4                  |
| Objectives                         | 4  | Provide an explicit statement of questions being addressed with reference to participants, interventions, comparisons, outcomes, and study design (PICOS).                                                                                                                                                  | 4                  |
| <b>METHODS</b>                     |    |                                                                                                                                                                                                                                                                                                             |                    |
| Protocol and registration          | 5  | Indicate if a review protocol exists, if and where it can be accessed (e.g., Web address), and, if available, provide registration information including registration number.                                                                                                                               | 5                  |
| Eligibility criteria               | 6  | Specify study characteristics (e.g., PICOS, length of follow-up) and report characteristics (e.g., years considered, language, publication status) used as criteria for eligibility, giving rationale.                                                                                                      | 5                  |
| Information sources                | 7  | Describe all information sources (e.g., databases with dates of coverage, contact with study authors to identify additional studies) in the search and date last searched.                                                                                                                                  | 5                  |
| Search                             | 8  | Present full electronic search strategy for at least one database, including any limits used, such that it could be repeated.                                                                                                                                                                               | Appendix 1         |
| Study selection                    | 9  | State the process for selecting studies (i.e., screening, eligibility, included in systematic review, and, if applicable, included in the meta-analysis).                                                                                                                                                   | 5                  |
| Data collection process            | 10 | Describe method of data extraction from reports (e.g., piloted forms, independently, in duplicate) and any processes for obtaining and confirming data from investigators.                                                                                                                                  | 5/6                |
| Data items                         | 11 | List and define all variables for which data were sought (e.g., PICOS, funding sources) and any assumptions and simplifications made.                                                                                                                                                                       | Table 1 and 2      |
| Risk of bias in individual studies | 12 | Describe methods used for assessing risk of bias of individual studies (including specification of whether this was done at the study or outcome level), and how this information is to be used in any data synthesis.                                                                                      | 6                  |
| Summary measures                   | 13 | State the principal summary measures (e.g., risk ratio, difference in means).                                                                                                                                                                                                                               | 6                  |
| Synthesis of results               | 14 | Describe the methods of handling data and combining results of studies, if done, including measures of consistency (e.g., I <sup>2</sup> ) for each meta-analysis. <a href="http://bmjopen.bmj.com/site/about/guidelines.xhtml">http://bmjopen.bmj.com/site/about/guidelines.xhtml</a>                      | 6                  |

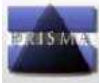

# PRISMA 2009 Checklist

Page 1 of 2

| Section/topic                 | #  | Checklist item                                                                                                                                                                                           | Reported on page #           |
|-------------------------------|----|----------------------------------------------------------------------------------------------------------------------------------------------------------------------------------------------------------|------------------------------|
| Risk of bias across studies   | 15 | Specify any assessment of risk of bias that may affect the cumulative evidence (e.g., publication bias, selective reporting within studies).                                                             | 5                            |
| Additional analyses           | 16 | Describe methods of additional analyses (e.g., sensitivity or subgroup analyses, meta-regression), if done, indicating which were pre-specified.                                                         | N/A                          |
| <b>RESULTS</b>                |    |                                                                                                                                                                                                          |                              |
| Study selection               | 17 | Give numbers of studies screened, assessed for eligibility, and included in the review, with reasons for exclusions at each stage, ideally with a flow diagram.                                          | 6 and Fig 1                  |
| Study characteristics         | 18 | For each study, present characteristics for which data were extracted (e.g., study size, PICOS, follow-up period) and provide the citations.                                                             | Table 1 and 2                |
| Risk of bias within studies   | 19 | Present data on risk of bias of each study and, if available, any outcome level assessment (see item 12).                                                                                                | Table 1 and 2 and Appendix 2 |
| Results of individual studies | 20 | For all outcomes considered (benefits or harms), present, for each study: (a) simple summary data for each intervention group (b) effect estimates and confidence intervals, ideally with a forest plot. | N/A                          |
| Synthesis of results          | 21 | Present results of each meta-analysis done, including confidence intervals and measures of consistency.                                                                                                  | N/A                          |
| Risk of bias across studies   | 22 | Present results of any assessment of risk of bias across studies (see Item 15).                                                                                                                          | N/A                          |
| Additional analysis           | 23 | Give results of additional analyses, if done (e.g., sensitivity or subgroup analyses, meta-regression [see Item 16]).                                                                                    | N/A                          |
| <b>DISCUSSION</b>             |    |                                                                                                                                                                                                          |                              |
| Summary of evidence           | 24 | Summarize the main findings including the strength of evidence for each main outcome; consider their relevance to key groups (e.g., healthcare providers, users, and policy makers).                     | 11                           |
| Limitations                   | 25 | Discuss limitations at study and outcome level (e.g., risk of bias), and at review-level (e.g., incomplete retrieval of identified research, reporting bias).                                            | 12                           |
| Conclusions                   | 26 | Provide a general interpretation of the results in the context of other evidence, and implications for future research.                                                                                  | 13/14                        |
| <b>FUNDING</b>                |    |                                                                                                                                                                                                          |                              |
| Funding                       | 27 | Describe sources of funding for the systematic review and other support (e.g., supply of data); role of funders for the systematic review.                                                               | 14/15                        |

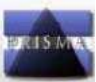

# PRISMA 2009 Checklist

1  
2  
3  
4  
5  
6  
7  
8  
9  
10  
11  
12  
13  
14  
15  
16  
17  
18  
19  
20  
21  
22  
23  
24  
25  
26  
27  
28  
29  
30  
31  
32  
33  
34  
35  
36  
37  
38  
39  
40  
41  
42  
43  
44  
45  
46  
47  
48  
49

From: Moher D, Liberati A, Tetzlaff J, Altman DG, The PRISMA Group (2009). Preferred Reporting Items for Systematic Reviews and Meta-Analyses: The PRISMA Statement. PLoS Med 6(6): e1000097. doi:10.1371/journal.pmed1000097

For more information, visit: [www.prisma-statement.org](http://www.prisma-statement.org).

Page 2 of 2

For peer review only

# BMJ Open

## Patient experience of NHS Health Checks: a systematic review and qualitative synthesis

|                                 |                                                                                                                                                                                                                                                                                                                                                                                                                                                                                                                                                                                                                                         |
|---------------------------------|-----------------------------------------------------------------------------------------------------------------------------------------------------------------------------------------------------------------------------------------------------------------------------------------------------------------------------------------------------------------------------------------------------------------------------------------------------------------------------------------------------------------------------------------------------------------------------------------------------------------------------------------|
| Journal:                        | <i>BMJ Open</i>                                                                                                                                                                                                                                                                                                                                                                                                                                                                                                                                                                                                                         |
| Manuscript ID                   | bmjopen-2017-017169.R1                                                                                                                                                                                                                                                                                                                                                                                                                                                                                                                                                                                                                  |
| Article Type:                   | Research                                                                                                                                                                                                                                                                                                                                                                                                                                                                                                                                                                                                                                |
| Date Submitted by the Author:   | 05-May-2017                                                                                                                                                                                                                                                                                                                                                                                                                                                                                                                                                                                                                             |
| Complete List of Authors:       | Usher-Smith, Juliet; University of Cambridge, The Primary Care Unit<br>Harte, Emma; RAND Europe<br>MaLure, Calum; RAND Europe<br>Martin, Adam; Academic Unit of Health Economics, Leeds Institute of Health Sciences<br>Saunders, Catherine; University of Cambridge,<br>Meads, Catherine; Anglia Ruskin University, Faculty of Health, Social Care and Education<br>Walter, Fiona; University of Cambridge, Dept of Public Health and Primary Care<br>Griffin, Simon; University of Cambridge, The Primary Care Unit; University of Cambridge, MRC Epidemiology Unit<br>Mant, Jonathan; University of Cambridge, The Primary Care Unit |
| <b>Primary Subject Heading</b>: | Public health                                                                                                                                                                                                                                                                                                                                                                                                                                                                                                                                                                                                                           |
| Secondary Subject Heading:      | Cardiovascular medicine, Communication, Qualitative research                                                                                                                                                                                                                                                                                                                                                                                                                                                                                                                                                                            |
| Keywords:                       | NHS Health Check, patient experience, systematic review, qualitative synthesis                                                                                                                                                                                                                                                                                                                                                                                                                                                                                                                                                          |
|                                 |                                                                                                                                                                                                                                                                                                                                                                                                                                                                                                                                                                                                                                         |

SCHOLARONE™  
Manuscripts

1  
2  
3 **Patient experience of NHS Health Checks: a systematic review and qualitative synthesis**  
4

5  
6 Usher-Smith JA<sup>1</sup>, Harte E<sup>2</sup>, MacLure C<sup>2</sup>, Martin A<sup>3</sup>, Saunders CL<sup>1</sup>, Meads C<sup>4</sup>, Walter FM<sup>1</sup>,  
7  
8 Griffin SJ<sup>1,5</sup>, Mant J<sup>1</sup>.  
9

10  
11 <sup>1</sup>The Primary Care Unit, Institute of Public Health, University of Cambridge, Box 113  
12 Cambridge Biomedical Campus, Cambridge, CB2 0SR, UK

13 <sup>2</sup>RAND Europe, Westbrook Centre, Milton Road, Cambridge, CB4 1YG, UK

14  
15 <sup>3</sup>Academic Unit of Health Economics, Leeds Institute of Health Sciences, University of  
16  
17 Leeds, Leeds, LS2 9LJ, UK

18  
19 <sup>4</sup>Faculty of Health, Social Care and Education, Anglia Ruskin University

20  
21 <sup>5</sup>MRC Epidemiology Unit, University of Cambridge, Institute of Metabolic Science,  
22  
23 Cambridge, CB2 0QQ, UK  
24

25  
26 Correspondence to: Juliet Usher-Smith [jau20@medschl.cam.ac.uk](mailto:jau20@medschl.cam.ac.uk)  
27

28  
29  
30 Key words: NHS Health Check, patient experience, systematic review, qualitative synthesis  
31  
32  
33  
34  
35  
36  
37  
38  
39  
40  
41  
42  
43  
44  
45  
46  
47  
48  
49  
50  
51  
52  
53  
54  
55  
56  
57  
58  
59  
60

1  
2  
3 **ABSTRACT (300 words)**  
4  
5

6 **Objective:** To review the experiences of patients attending NHS Health Checks in England.  
7

8 **Design:** A systematic review of quantitative and qualitative studies with a thematic synthesis  
9 of qualitative studies.  
10

11 **Data sources:** An electronic literature search of Medline, Embase, Health Management  
12 Information Consortium (HMIC), Cumulative Index of Nursing and Allied Health Literature  
13 (CINAHL), Global Health, PsycInfo, Web of Science, OpenGrey, the Cochrane Library,  
14 NHS Evidence, Google Scholar, Google, Clinical Trials.gov and the ISRCTN registry to  
15 09/11/16 with no language restriction and manual screening of reference lists of all included  
16 papers.  
17  
18

19 **Inclusion criteria:** Primary research reporting experiences of patients who have attended  
20 NHS Health Checks.  
21

22 **Results:** 20 studies met the inclusion criteria, 9 reporting quantitative data and 15 qualitative  
23 data. There were consistently high levels of reported satisfaction in surveys, with over 80%  
24 feeling that they had benefited from an NHS Health Check. Data from qualitative studies  
25 showed that the NHS Health Check had been perceived to act as a wake-up call for many  
26 who reported having gone on to make substantial lifestyle changes which they attributed to  
27 the NHS Health Check. However, some had been left with a feeling of unmet expectations,  
28 were confused about or unable to remember their risk scores, found the lifestyle advice too  
29 simplistic and non-personalised, or were confused about follow-up.  
30  
31

32 **Conclusions:** Whilst participants were generally very supportive of the NHS Health Check  
33 programme and examples of behaviour change were reported, there are a number of areas  
34 where improvements could be made. These include greater clarity around the aims of the  
35 programme within the promotional material, more pro-active support for lifestyle change, and  
36 greater appreciation of the challenges of communicating risk and the limitations of relying on  
37 the risk score alone as a trigger for facilitating behaviour change.  
38  
39  
40  
41  
42  
43  
44  
45  
46  
47  
48  
49  
50  
51  
52  
53  
54  
55  
56  
57  
58  
59  
60

**Strengths and limitations of this study**

- This is the first study to systematically review quantitative and qualitative studies that consider the experiences of patients who have attended NHS Health Checks.
- The use of broad inclusion criteria and the systematic search of multiple databases and the grey literature allowed us to include studies that had not been published in peer reviewed scientific journals.
- The included studies were of varying quality.
- The quantitative studies reporting responses to surveys had response rates between 23% and 43%, making them at risk of responder bias.
- The qualitative studies included small, selected groups of participants whose expressed views were likely to be affected by both recall bias and social desirability bias.

peer review only

## INTRODUCTION

The NHS Health Check programme is one of the largest current prevention initiatives in England. Introduced in 2009 to improve cardiovascular disease (CVD) risk factors through behavioural change and treatment informed by risk stratification, it became a mandated public health service in 2013. Local authorities are now responsible for offering an NHS Health Check to individuals aged 40-74 without existing cardiovascular disease, diabetes or hypertension every five years. The NHS Health Check itself consists of three components: risk assessment, communication of risk and risk management<sup>1</sup>. For CVD the QRISK®2 risk tool<sup>2</sup> is first used to estimate the individual's risk of developing CVD based on risk factors including age, sex, ethnicity, smoking status, height and weight, family history of coronary heart disease, blood pressure, and cholesterol. That estimated risk, expressed as the percentage risk of developing disease over the next 10 years, is then used to raise awareness of relevant risk factors and inform discussion about the lifestyle and medical approaches best suited to managing the individual's risk of disease. Risk assessment for diabetes was introduced in 2016 and patients at high risk of developing type 2 diabetes who should receive a screening blood test are identified either by using either validated risk assessment tools or a diabetes filter<sup>1</sup>. Based on modelling studies of cross-sectional data it was estimated that the programme could prevent 1,600 heart attacks and strokes, at least 650 premature deaths, and over 4,000 new cases of diabetes each year with an estimated cost per quality adjusted life year (QALY) of approximately £3,000<sup>3</sup>. However, whether NHS Health Checks represent an efficient use of scarce health promotion resources has been questioned<sup>4,5</sup>.

Alongside clinical effectiveness and safety, patient experience is increasingly recognised worldwide as one of the three elements of high-quality healthcare<sup>6-8</sup>. As well as enabling a better understanding of current problems with healthcare delivery, informing continuous improvement and redesign of services and helping professionals reflect on practice, a recent systematic review has shown that patient experience is positively associated with self-rated and objectively measured health outcomes; adherence to recommended medication and treatments; preventative care; healthcare resource use; technical quality-of-care delivery; and adverse events<sup>9,10</sup>. There is also an association at the organizational level; general practices that provide higher quality clinical care (measured through higher QOF performance) are also those in which reported patient experience is better. Understanding patients' experiences of NHS Health Checks is, therefore, central to understanding the implementation of the programme, its potential impact over the first eight years, and ways in which it might be



1  
2  
3 improved to increase adherence to lifestyle advice and preventive treatments and, ultimately,  
4 improve health outcomes.  
5  
6  
7

8 Since the introduction of the NHS Health Check programme, a growing number of both  
9 quantitative and qualitative studies reporting patients' experiences of NHS Health Checks  
10 have been published. This article provides the first systematic synthesis of these studies.  
11  
12

## 13 14 **METHODS**

15 We performed a systematic literature review following a study protocol (available on request)  
16 that followed the PRISMA guidelines.  
17  
18  
19

### 20 21 **Search strategy**

22 We used the results of an existing literature review conducted by Public Health England  
23 covering the period from 1<sup>st</sup> January 1996 to 9<sup>th</sup> November 2016 supplemented by a search of  
24 the Web of Science, Science Citation Index and OpenGrey covering the same period. We also  
25 hand searched the reference lists of all included publications, searched online for additional  
26 articles published by authors of the included studies, and contacted the NHS Health Checks  
27 Expert Scientific and Clinical Advisory Panel to identify studies in progress or near  
28 completion. The PHE literature review included the following sources: Medline, Embase,  
29 Health Management Information Consortium (HMIC), Cumulative Index of Nursing and  
30 Allied Health Literature (CINAHL), Global Health, PsycInfo, the Cochrane Library, NHS  
31 Evidence, Google Scholar, Google, Clinical Trials.gov and the ISRCTN registry. Full details  
32 of all the search strategies are shown in Appendix 1. No language restrictions were applied.  
33  
34  
35  
36  
37  
38  
39  
40  
41  
42

### 43 44 **Study selection**

45 To be included studies had to be primary research reporting the opinions or experiences of  
46 people who had attended NHS Health Checks. Commentaries, editorials and opinion pieces  
47 were excluded.  
48  
49  
50

51 The selection of studies was performed in a two-stage process. First, the titles and abstracts  
52 were screened to identify studies relevant to the NHS Health Check. This stage had already  
53 been completed by a senior information scientist at PHE for those identified in the literature  
54 review conducted by PHE. One reviewer (EH) followed this process for the additional  
55 citations identified from the Web of Science database.  
56  
57  
58  
59  
60

1  
2  
3  
4  
5 In the second stage two researchers (JUS and AM) reviewed the full texts of all studies  
6 identified as relevant to the NHS Health Checks to select those reporting the opinions or  
7 experiences of people who had attended NHS Health Checks. Where it was unclear whether  
8 or not these inclusion criteria were met for any given study, we discussed those studies at  
9 consensus meetings with the wider research team.  
10  
11  
12

### 13 14 15 **Data extraction, quality assessment and synthesis**

16 Data on the study design, time period, recruitment methods, participants, analysis, and  
17 quantitative results were extracted independently for each study by two reviewers (JUS +  
18 EH/CMa) onto data extraction forms developed to minimise bias. The quality of all each  
19 included studies was assessed at the same time using the Critical Appraisal Skills  
20 Programmes (CASP)<sup>11</sup> checklist for qualitative research or a checklist combining the CASP  
21 checklists for cohort studies and randomised-controlled trials for the quantitative studies. We  
22 chose these checklists as they are included within the Cochrane Supplemental Guidance for  
23 Inclusion of Qualitative Research in Cochrane Systematic Reviews of Interventions<sup>12</sup> and  
24 identified as one of the 14 ‘best’ tools for evaluating non-randomised quantitative studies in a  
25 review<sup>13</sup> respectively, and we have successfully used them in previous reviews<sup>14,15</sup>. For  
26 studies that included both quantitative and qualitative methods, quality assessment was  
27 completed separately for both aspects of the study. No studies were excluded on the basis of  
28 quality alone.  
29  
30  
31  
32  
33  
34  
35  
36  
37  
38

39 As a result of the variation in methods use and experiences reported, we were unable to  
40 perform meta-analysis for the quantitative data and so synthesised that data descriptively. We  
41 synthesised the qualitative data using thematic synthesis<sup>16</sup>. Following reading and re-reading  
42 of the included studies, this synthesis included three stages: 1) coding of the findings of the  
43 primary studies; 2) organisation of these codes into related areas to develop descriptive  
44 themes; and 3) the development of analytical themes. As described by Thomas and Harden<sup>16</sup>,  
45 we considered all the text under the headings ‘Results’ or ‘Findings’ within the included  
46 studies as findings of the primary studies. The initial line-by-line coding of those findings  
47 was performed by at least two researchers (JUS + EH/CMa), each from a different  
48 disciplinary background (academic general practice, public services, and health systems and  
49 innovation). All have experience conducting and analysing qualitative research but none had  
50 been involved in any of the included studies. The codes resulting from that process were then  
51  
52  
53  
54  
55  
56  
57  
58  
59  
60

1  
2  
3 discussed with members of the wider research team and the subsequent stages were an  
4 iterative process with both the descriptive and analytical themes developed through a series  
5 of meetings involving researchers from a range of clinical and non-clinical backgrounds  
6 (academic general practice, public health, health economics, clinical statistics, evidence  
7 synthesis and qualitative research). To allow an appreciation of the primary data, we have  
8 included illustrative quotations from the original studies alongside the analytical themes in  
9 this report.  
10  
11  
12  
13

14  
15  
16 A summary of the findings reported in this manuscript have been published online by Public  
17 Health England (available at  
18 [http://www.healthcheck.nhs.uk/commissioners\\_and\\_providers/evidence/](http://www.healthcheck.nhs.uk/commissioners_and_providers/evidence/)) and RAND  
19 ([http://www.rand.org/content/dam/rand/pubs/external\\_publications/EP60000/EP67129/RAN](http://www.rand.org/content/dam/rand/pubs/external_publications/EP60000/EP67129/RAND_EP67129.pdf)  
20 [D\\_EP67129.pdf](http://www.rand.org/content/dam/rand/pubs/external_publications/EP60000/EP67129/RAND_EP67129.pdf)). Permission from both has been obtained to publish the results in this  
21 journal.  
22  
23  
24  
25  
26  
27  
28  
29

## 30 RESULTS

31 From an initial 18,524 titles and abstracts, 178 articles were identified as potentially relevant  
32 to the NHS Health Checks and were reviewed at full text level (Figure 1). Of those, we  
33 excluded 162. The most common reasons for excluding papers were that they did not include  
34 any relevant data, were duplicates or commentaries, or did not describe NHS Health Checks.  
35 Four additional articles were identified through citation searching. This review is, therefore,  
36 based on 20 articles.  
37  
38  
39  
40  
41  
42

### 43 Quantitative results from patient satisfaction questionnaires

44 Of those 20 articles, nine include quantitative results from surveys of participants who had  
45 attended NHS Health Checks<sup>17-25</sup>. The details of these nine articles are shown in Table 1 and  
46 full details of the quality assessment in Appendix 2. Four are high quality journal articles  
47 published in peer reviewed journals in which questionnaires were sent to all those who had  
48 attended an NHS Health Check in either general practices<sup>17,18</sup> or pharmacies<sup>24,25</sup>. Response  
49 rates were between 23.4% and 43%. A fifth study of the views of those attending outreach  
50 clinic at cricket groups was also published in a peer reviewed journal but does not report the  
51 methods in detail or the response rate<sup>20</sup>. Another is a report of a service evaluation in which  
52  
53  
54  
55  
56  
57  
58  
59  
60

1  
2  
3 the views of ethnic minority participants were particularly sought<sup>21</sup> and the final three are low  
4 quality case study reports which have not reported methods or response rate<sup>19,22,23</sup>.  
5  
6  
7

8 The findings from those nine studies are summarised in Table 2. Eight included questions  
9 about the overall experience and satisfaction with attending an NHS Health Check. Over 80%  
10 of respondents rated the experience highly or reported high levels of satisfaction. Between  
11 86% and 99% also felt they had benefited from the NHS Health Check or would be likely or  
12 very likely to return if invited back and over 78% would recommend attendance to others.  
13 When reported ( $n=4$ ), 88% to 99% of respondents felt they were given enough time.  
14 However, between 7% and 15% still had unanswered questions after the NHS Health Check.  
15  
16  
17  
18  
19  
20  
21  
22

### 23 **Qualitative data on patient experience**

24 Patient experience was also reported in 15 qualitative studies. Three performed content  
25 analysis on free-text responses provided in surveys<sup>17,18,21</sup> whilst the others conducted focus  
26 groups or interviews with between 8 and 45 participants. Ten are journal articles published in  
27 peer reviewed journals<sup>17,18,25-32</sup> four are research reports of service evaluations<sup>21,33-35</sup>, and one  
28 is a Masters thesis<sup>36</sup>. All recruited people who had attended NHS Health Checks either  
29 through invitations sent out from general practices or from community settings. Most  
30 included approximately equal numbers of men and women. Three studies had particularly  
31 sought to describe the experiences of those from ethnic minority groups<sup>21,31,32</sup>. In the quality  
32 assessment, ten were high quality and five medium quality, with all addressing a clearly  
33 focused issue and using an appropriate qualitative method and design. The reflexivity showed  
34 the greatest variation across the studies with only five scoring medium or high for  
35 consideration of the relationship between the research team and participants. Most analysed  
36 data using thematic analysis. Further details of the design and methods used in those studies  
37 are given in Table 3 and the full quality assessment in Appendix 3.  
38  
39  
40  
41  
42  
43  
44  
45  
46  
47  
48

49 Thematic synthesis of these 15 studies identified five main analytical themes: 1) The NHS  
50 Health Check as a potential trigger for behaviour change; 2) Unmet expectations; 3) Limited  
51 understanding of the risk score; 4) Preference for better information; and 5) Confusion  
52 around follow-up. The primary articles contributing to each of those themes are shown in  
53 Table 4 and details of each of the themes given below.  
54  
55  
56  
57  
58  
59  
60

### 1. *The NHS Health Check as a potential trigger for behaviour change*

Participants variously described the NHS Health Check as a “wake-up call”<sup>21,29</sup>, a “reality check”<sup>29</sup>, a “kind of a turning point”<sup>36</sup>, or an “eye-opener”<sup>32</sup>, which helped bring patients’ health into focus by highlighting potential underlying health issues of which they were not necessarily cognizant<sup>18</sup> and making them aware that there were lifestyle-related diseases to which they may be susceptible and which they may be able to prevent<sup>32,34</sup>.

*“It’s really good. It makes you aware of what problems are around. What you can get and that. It is really good. It teaches you..it’s an eye-opener for people who would want to do things properly”<sup>32</sup>*

For some, this reputedly led on to behaviour change, with many of the studies citing examples of participants who had reported making changes that they attributed to having attended the NHS Health Check<sup>26,29–33,37</sup>. These included changes to diet, cutting down on smoking, decreasing alcohol intake and increasing physical activity.

*“I’ve changed my diet um and, and lost a stone in weight I think as a result actually. So I’m quite happy with that, that makes me feel even healthier”<sup>30</sup>*

*“Having the results of the check, I’ve actually started to go to [swimming baths] a couple of times, so I’ve made some progress.....and I’ve actually felt better in meself.”<sup>29</sup>*

In general, dietary changes were perceived to be the easiest changes to make, particularly small changes that did not cause too much disruption to their daily routines<sup>37</sup> and there was recognition that changing behaviour was hard, with a number of barriers identified (Box 1).

### 2. *Unmet expectations*

Despite this potential influence on behaviour, a strong theme throughout many of the studies was that of unmet expectations that some participants were left with at the end of the NHS Health Check.

For many, this arose from confusion about the purpose of the NHS Health Check. The comparison made between the NHS Health Check and an ‘MOT’ in the promotional material

1  
2  
3 and the use of the term ‘Health Check’ left many expecting the NHS Health Check to include  
4 a more general wide-ranging assessment of health and not just risk of cardiovascular  
5 disease<sup>18,26,34</sup>.

6  
7  
8  
9  
10 *“I just assumed that they would test you for everything when you were there. My*  
11 *perception of reading through things was that it was going to be a good overhaul, you*  
12 *know overall body check for everything.”<sup>34</sup>*

13  
14  
15  
16 *“As a general health check it was not a series of tests as I expected. Only centred*  
17 *around the result of a blood test. Not comprehensive as I would have expected”<sup>17</sup>*

18  
19  
20  
21 Additional specific areas that participants had been expecting or thought should be covered  
22 included: a Well woman check<sup>34</sup>; diabetes checks for all<sup>31,34,35</sup>; cancer screening<sup>26,34,36</sup>; an  
23 assessment of mental well-being<sup>26</sup>; an ECG<sup>26</sup>; testing for anaemia<sup>26</sup>; discussion around health  
24 conditions that impacted on their daily lives, such as joint and back pain<sup>36</sup>; and chronic long-  
25 term conditions<sup>35</sup>.

### 31 **3. Limited understanding of the risk score**

32  
33 Whilst some participants reported improved understanding of CVD risk following an NHS  
34 Health Check<sup>17,25,32</sup>, a common theme throughout the studies was participants’ limited  
35 understanding of the risk score.

36  
37  
38  
39 Across many of the studies there was evidence that a large number of participants were either  
40 not able to recall being provided with a risk estimate at all<sup>17,26,27</sup>, found the risk score  
41 confusing<sup>18,30,34</sup>, or had interpreted it incorrectly<sup>26,29,30,36</sup>.

42  
43  
44  
45  
46 *“my cholesterol is high...and, I had a score saying sixteen per cent diabetes in ten*  
47 *years. What does that mean? I’ve got no idea what that means. It sounds bad because*  
48 *it’s higher than it’s meant to be but is it?”<sup>30</sup>*

49  
50  
51  
52  
53 *“My QRisk score is 11 per cent. But after getting someone to Google it for me, we*  
54 *still have no idea what it means. It should be explained better in a letter from the*  
55 *Doctor”<sup>18</sup>*

1  
2  
3 The score itself also appeared to have little meaning or significance for most participants.  
4 Low scores (<20% 10-year estimated risk) were sometimes perceived as meaning there was  
5 nothing to worry about<sup>29</sup>, but participants with low-risk scores were as likely to report being  
6 worried or anxious after receiving the scores as those with high-risk scores<sup>30</sup>. When  
7 describing their motivation to change behaviour, in general participants also described how it  
8 was not necessarily related to their risk score, and how even a high risk score was not  
9 necessarily enough to motivate them to try and change<sup>29,36</sup>.

10  
11  
12  
13  
14  
15  
16 *“Sometimes you need a reason and I think it was like me, I needed a reason [to*  
17 *change] and isn't it sad that showing me the percentage wasn't reason enough for me*  
18 *to give up [smoking].”<sup>29</sup>*

#### 21 22 23 **4. Preferences for better information**

24 Most participants reported receiving lifestyle advice within the NHS Health Check. Many,  
25 however, felt it was too simple, brief, superficial or generic and felt that they would have  
26 benefitted from more detail and more personalised information<sup>21,25,29,30,32,36,37</sup>.

27  
28  
29  
30  
31 *“And it was that kind of information which was the kind of the bit beyond, you know,*  
32 *eat less, exercise more, don't smoke, don't drink ..that would have been useful ..the*  
33 *kind of advice that was on offer was actually very, um, simple”<sup>30</sup>*

34  
35  
36  
37  
38 For some this lack of personalised information led to confusion and uncertainty<sup>36</sup>, with some  
39 feeling that they had received mixed messages about their health<sup>26</sup> and been left unsure about  
40 what actions they should take<sup>33</sup>. This was not a universal view, however, with some seeing  
41 the value in being provided with ‘common knowledge’ again as it afforded a fresh way of  
42 looking at their lifestyle and, in one study the simplicity of the information appeared to  
43 encourage participants to make changes to their behaviour<sup>29</sup>.

44  
45  
46  
47  
48  
49 *“So I thought it was very helpful it was very informative and it was thought-*  
50 *provoking, it just gave us some fresh view on things, because you can get very easily*  
51 *into doing what you think is okay”<sup>36</sup>*

52  
53  
54  
55  
56 In most cases the lifestyle advice had been provided face-to-face but participants also valued,  
57 or felt it would have been helpful to have received, written information both for their own  
58  
59  
60



1  
2  
3 reference and also as a means to encourage behaviour change among friends and  
4 family<sup>18,29,34</sup>.

5  
6  
7  
8 *“Well I suppose it’s good to have a question and answer thing cos you can have*  
9 *somebody explain it to you. But I suppose you could, something written’d be quite*  
10 *useful.”*<sup>26</sup>

### 11 12 13 14 15 **5. Confusion around follow-up**

16 The final theme related to confusion over follow-up<sup>21,32,33</sup>. This was particularly seen  
17 amongst participants who had attended NHS Health Checks in community settings.  
18 Individuals felt unsure about what steps should be taken next, specifically in relation to  
19 whether they needed to contact their GP or if their GP would contact them if any causes for  
20 concern had been identified<sup>33</sup>. Participants also reported a lack of sufficient information on  
21 follow-up and sign-posting to other NHS services<sup>21</sup>.

22  
23  
24  
25  
26  
27  
28 *“She never said go and see your doctor. She ran out of some leaflets and she circled*  
29 *them and said go on the Internet”*<sup>21</sup>

30  
31  
32  
33 Some participants also reported that they would have liked their healthcare professionals to  
34 be more pro-active in supporting them to make lifestyle changes and felt there should have  
35 been on-going follow-up and monitoring<sup>26,32,35</sup>.

## 36 37 38 39 **DISCUSSION**

### 40 41 **Principal findings**

42 This study is the first systematic review of patient experience of NHS Health Checks. It  
43 shows that, amongst those who respond to patient satisfaction surveys, there are consistently  
44 very high levels of satisfaction with NHS Health Checks reported, with over 80% feeling that  
45 they had benefited from an NHS Health Check. However, despite these overall high levels of  
46 satisfaction, there was evidence from interviews that some participants were left with a  
47 feeling of unmet expectations. For some this appeared to arise from confusion about the  
48 purpose of the NHS Health Check whilst others had been expecting a more general  
49 assessment of health. The cardiovascular risk score also appeared to generate confusion: it  
50 was poorly understood, interpreted differently among individuals with the same level of risk,  
51 and seemed to have little meaning or significance for people in terms of how to use it to think  
52  
53  
54  
55  
56  
57  
58  
59  
60



1  
2  
3 about their health and future planning. Most participants reported receiving lifestyle  
4 information within the NHS Health Check but for many it was regarded as too simple and not  
5 sufficiently personalised. Nevertheless, there was evidence that the NHS Health Check was  
6 perceived to act as a wake-up call for many participants who had gone on to make lifestyle  
7 changes which they attributed to the NHS Health Check.  
8  
9  
10

### 11 12 13 **Strengths and Limitations**

14 The main strengths of this review are the systematic search of multiple electronic databases,  
15 the manual searching of the reference lists of all included studies, and the thematic approach  
16 to synthesis of the qualitative data. By including searches of the grey literature and the  
17 internet alongside electronic repositories we were able to include studies that have not been  
18 published in peer reviewed scientific journals, reducing the risk of selective reporting bias.  
19 Whilst we cannot exclude the possibility that additional local evaluations may have been  
20 performed or that we overlooked studies at the screening stage, we think it unlikely that they  
21 would substantially alter the main findings. Choosing to conduct a thematic synthesis for the  
22 qualitative research also ensured that we used a systematic approach to identify common  
23 themes across the studies and interpret those findings. Although some argue against the  
24 synthesis of qualitative research on the grounds that the findings of individual studies are de-  
25 contextualised and the concepts identified in one setting are not applicable to another<sup>38</sup>, the  
26 systematic approach to coding and subsequent development of overarching themes guided by  
27 our research question enabled us not only to provide a synthesis of the evidence to inform  
28 practice but also to develop additional interpretations and conceptual insights beyond the  
29 findings of the primary studies.  
30  
31  
32  
33  
34  
35  
36  
37  
38  
39  
40  
41  
42

43 The main limitations relate to the included studies. The quantitative surveys were of varying  
44 quality with response rates only reported in four of the nine studies and comparison between  
45 responders and non-responders only in one. Where reported, the response rates varied  
46 between 23% and 43%. Although survey response rates alone are a poor indicator of bias<sup>39,40</sup>,  
47 the included studies are, therefore, all at risk of responder bias, and may represent the views  
48 of those more engaged with preventive healthcare or with particularly strong opinions. Many  
49 also measured patient satisfaction rather than patient experience. Unlike patient experience  
50 data which aim to avoid value judgments, patient satisfaction is a broad and often ill-defined  
51 concept that is multi-dimensional and influenced by a range of factors, including cultural  
52 norms, health status and prior experience of health care<sup>41</sup>. Reports of patient satisfaction can,  
53  
54  
55  
56  
57  
58  
59  
60

1  
2  
3 therefore, vary widely between different patients in identical situations and in one study in  
4 which patients were asked a single question about how satisfied overall they were with their  
5 primary care practice, only 4.6% of the variance in their satisfaction ratings was a result of  
6 differences between practices<sup>42</sup>. Unlike patient experience data, improvements in patient  
7 satisfaction data are also not associated with improvements in care quality<sup>43</sup>.  
8  
9  
10

11  
12  
13 The qualitative studies also included small, selected groups of participants whose expressed  
14 views are likely to be affected by both recall bias (systematic errors due to inaccuracy of  
15 recollections about NHS Health Checks) and social desirability bias (the tendency of  
16 interviewees to give responses that they think might be viewed favourably by the  
17 interviewer)<sup>44</sup>. By virtue of the fact that they have chosen to take part in medical research the  
18 participants may also be more interested in their health than the general population so their  
19 views may not reflect the full range of views and experiences of those attending NHS Health  
20 Checks.  
21  
22  
23  
24  
25  
26  
27

### 28 **Comparison with existing literature**

29  
30 The high levels of satisfaction reported are consistent with those reported for other NHS  
31 services, for example the General Practice Patient Survey in which the median overall  
32 satisfaction score was 86.2<sup>10</sup>. The discrepancy between the very high levels of reported  
33 satisfaction in surveys and the more negative comments made in face-to-face interviews is  
34 also consistent with previous research in other areas of health care<sup>45-48</sup>. For example, studies  
35 have found that positive survey responses can mask important negative dimensions which  
36 patients subsequently express qualitatively<sup>45-47</sup> and that patients may respond differently to  
37 questions about services depending on how, where and when questions are asked<sup>48</sup>. The  
38 interpretation of 'good' absolute patient feedback scores should, therefore, not lead to  
39 complacency and the conclusion that improvements need not be considered.  
40  
41  
42  
43  
44  
45  
46  
47

48 The challenges of communicating risk are well known. Public understanding of risk is  
49 generally low and whilst reviews have shown that the way risk is presented affects risk  
50 perceptions<sup>49,50</sup>, even immediately after being provided with CVD risk information one in  
51 four people still have an inaccurate perception of their risk<sup>51</sup> and one in ten change their  
52 perceived risk in the opposite direction to the feedback they receive<sup>52</sup>. The confusion around  
53 the risk scores seen in this study may therefore reflect a combination of how the risk is  
54 presented by healthcare professionals and how individuals interpret it within the context of  
55  
56  
57  
58  
59  
60

1  
2  
3 the NHS Health Check. The finding that knowing the CVD risk score was not sufficient to  
4 motivate behaviour change is also consistent with guidance from the National Institute for  
5 Health and Clinical Excellence (NICE) on behaviour change<sup>53</sup> and previous systematic  
6 reviews<sup>54,14</sup>.  
7  
8  
9

### 11 **Implications for clinicians, policymakers and future research**

12 Whilst participants were generally very supportive of the NHS Health Check programme and  
13 examples of behaviour change were reported, this study highlights a number of areas where  
14 improvements could be made. In particular, the finding that a number of patients were  
15 unaware of the programme or had misunderstood the extent and purpose of the NHS Health  
16 Check suggests that more proactive communications may be needed to raise awareness of the  
17 programme overall and that patients need additional clarity about the programme when being  
18 invited. The expectation that the NHS Health Check would be a more general health check  
19 also raises questions about whether the programme should be expanded to cover other areas  
20 of health. The lack of clarity around follow-up and reports that participants would have liked  
21 their healthcare professionals to be more pro-active in supporting them to make lifestyle  
22 changes additionally suggests that there are potential missed opportunities to support  
23 behaviour change. This may be in part due to a lack of appropriate services to refer patients to  
24 but may also reflect a need for additional training for those delivering the NHS Health Check.  
25 Finally, the confusion around the CVD risk score amongst patients highlights the potential  
26 limitations of relying on the risk score alone as a trigger for facilitating behaviour change  
27 within NHS Health Checks and the need for adequate training and time for healthcare  
28 professionals to help patients understand their risk in line with best practice guidance<sup>50,55</sup>.  
29 Further research is also needed to determine whether different communication strategies,  
30 such as heart age<sup>56</sup>, improve understanding and subsequent behaviour change.  
31  
32  
33  
34  
35  
36  
37  
38  
39  
40  
41  
42  
43  
44  
45

### 46 **ACKNOWLEDGEMENTS**

47 We thank our patient and public representatives Kathryn Lawrence and Chris Robertson for  
48 providing helpful comments on the findings and the NHS Health Checks Expert Scientific  
49 and Clinical Advisory Panel working group for providing us with the initial literature search  
50 conducted by Public Health England. We would also like to thank Anna Knack, Research  
51 Assistant at RAND Europe, for her excellent research support, and Emma Pitchforth for her  
52 helpful comments on our analysis.  
53  
54  
55  
56  
57  
58  
59  
60

### Contributors

JUS developed the protocol, screened articles for inclusion, extracted and synthesised the quantitative and qualitative data, interpreted the findings and wrote the first draft of the manuscript. EH screened articles for inclusion, extracted and synthesised the qualitative data, interpreted the findings and critically revised the manuscript. CMA extracted and synthesised the qualitative data and critically revised the manuscript. AM screened articles for inclusion, interpreted the findings and critically revised the manuscript. CS, CM, FW, SG and JM developed the protocol, interpreted the findings and critically revised the manuscript.

### Funding

This work was funded by a grant from Public Health England. JUS was funded by an NIHR Clinical Lectureship and FW by an NIHR Clinician Scientist award. The views expressed in this publication are those of the authors and not necessarily those of the NHS, the NIHR or the Department of Health.

All researchers were independent of the funding body and the funder had no role in data collection, analysis and interpretation of data; in the writing of the report; or decision to submit the article for publication.

### Data sharing

All data are available from the reports or authors of the primary research. No additional data is available.

### Competing Interests

All authors have completed the Unified Competing Interest form at [www.icmje.org/coi\\_disclosure.pdf](http://www.icmje.org/coi_disclosure.pdf) (available on request from the corresponding author) and declare that (1) they have no support from or relationships with companies that might have an interest in the submitted work in the previous 3 years; (2) their spouses, partners, or children have no financial relationships that may be relevant to the submitted work; and (3) they have no non-financial interests that may be relevant to the submitted work.

The corresponding author has the right to grant on behalf of all authors and does grant on behalf of all authors, an exclusive licence on a worldwide basis to the BMJ Publishing Group Ltd and its Licensees to permit this article (if accepted) to be published in BMJ editions and

any other BMJ PGL products and sub-licences to exploit all subsidiary rights, as set out in our licence (<http://resources.bmj.com/bmj/authors/checklists-forms/licence-for-publication>).

All authors had full access to all of the data in the study and can take responsibility for the integrity of the data and the accuracy of the data analysis

The corresponding author affirms that the manuscript is an honest, accurate, and transparent account of the study being reported; that no important aspects of the study have been omitted; and that any discrepancies from the study as planned (and, if relevant, registered) have been explained.

## FIGURE LEGENDS

Figure 1. PRISMA flow diagram

## REFERENCES

- 1 Public Health England. NHS Health Check: Best Practice Guidance. Published Online First: 2017. [http://www.healthcheck.nhs.uk/commissioners\\_and\\_providers/guidance/national\\_guidance1/](http://www.healthcheck.nhs.uk/commissioners_and_providers/guidance/national_guidance1/)
- 2 Hippisley-Cox J, Coupland C, Vinogradova Y, *et al*. Predicting cardiovascular risk in England and Wales: prospective derivation and validation of QRISK2. *BMJ* 2008;**336**:1475–82.
- 3 Department of Health. Economic Modelling for Vascular Checks. 2008. [www.healthcheck.nhs.uk/document.php?o=225](http://www.healthcheck.nhs.uk/document.php?o=225)
- 4 Capewell S, McCartney M, Holland W. Invited debate: NHS Health Checks-a naked emperor? *J Public Health (Oxf)* 2015;**37**:187–92.
- 5 Dalton AR, Marshall T, McManus RJ. The NHS Health Check programme: a comparison against established standards for screening. *Br J Gen Pract* 2014;**64**:530–1.
- 6 Professor the Lord Darzi. High quality care for all: NHS Next Stage Review final report. 2008. [http://webarchive.nationalarchives.gov.uk/20130107105354/http://www.dh.gov.uk/en/Publicationsandstatistics/Publications/PublicationsPolicyAndGuidance/DH\\_085825](http://webarchive.nationalarchives.gov.uk/20130107105354/http://www.dh.gov.uk/en/Publicationsandstatistics/Publications/PublicationsPolicyAndGuidance/DH_085825)
- 7 Institute of Medicine. Crossing the quality chasm: a new health system for the 21st

- 1  
2  
3 century. 2001. <https://www.nationalacademies.org/hmd/~/media/Files/Report>  
4 [Files/2001/Crossing-the-Quality-Chasm/Quality Chasm 2001 report brief.pdf](https://www.nationalacademies.org/hmd/~/media/Files/Report)  
5  
6  
7 8 Campbell SM, Roland MO, Buetow SA. Defining quality of care. *Soc Sci Med*  
8 2000;**51**:1611–25.  
9  
10 9 Doyle C, Lennox L, Bell D. A systematic review of evidence on the links between  
11 patient experience and clinical safety and effectiveness. *BMJ Open* 2013;**3**:1–18.  
12  
13 10 Llanwarne NR, Abel GA, Elliott MN, *et al*. Relationship between clinical quality and  
14 patient experience: analysis of data from the english quality and outcomes framework  
15 and the National GP Patient Survey. *Ann Fam Med* 2013;**11**:467–72.  
16  
17 11 Critical Appraisal Skills Programme (CASP) Checklists. [http://www.casp-uk.net/casp-](http://www.casp-uk.net/casp-tools-checklists)  
18 [tools-checklists](http://www.casp-uk.net/casp-tools-checklists)  
19  
20 12 Cochrane Methods. Cochrane Supplemental Handbook Guidance.  
21 <http://methods.cochrane.org/qi/supplemental-handbook-guidance> (accessed 27  
22 Apr2017).  
23  
24 13 Deeks JJ, Dinnes J, D’Amico R, *et al*. Evaluating non-randomised intervention studies.  
25 *Health Technol Assess* 2003;**7**:iii–x, 1-173.  
26  
27 14 Usher-Smith JA, Silarova B, Schuit E, *et al*. Impact of provision of cardiovascular  
28 disease risk estimates to healthcare professionals and patients: a systematic review.  
29 *BMJ Open* 2015;**5**:e008717.  
30  
31 15 Malpass A, Shaw A, Sharp D, *et al*. ‘Medication career’ or ‘moral career’? The two  
32 sides of managing antidepressants: a meta-ethnography of patients’ experience of  
33 antidepressants. *Soc Sci Med* 2009;**68**:154–68.  
34  
35 16 Thomas J, Harden A. Methods for the thematic synthesis of qualitative research in  
36 systematic reviews. *BMC Med Res Methodol* 2008;**8**:45.  
37  
38 17 Krska J, du Plessis R, Chellaswamy H. Views and experiences of the NHS Health  
39 Check provided by general medical practices: cross-sectional survey in high-risk  
40 patients. *J Public Health (Bangkok)* 2015;**37**:210–7.  
41  
42 18 Baker C, Loughren EA, Crone D, *et al*. Patients’ perceptions of a NHS Health Check  
43 in the primary care setting. *Qual Prim Care* 2014;**22**:232–7.  
44  
45 19 Cowper. The NHS Health Check Leadership Forum : Summary and Findings. *NHS*  
46 *Heal Check Leadersh Forum* 2013.  
47  
48 20 Trivedy C, Vlaev I, Seymour R, *et al*. An evaluation of opportunistic health checks at  
49 cricket matches: the Boundaries for Life initiative. *Sport Soc* 2016;**437**:1–9.  
50  
51 21 NHS Greenwich. Evaluation of NHS Health Check PLUS Community Outreach  
52  
53  
54  
55  
56  
57  
58  
59  
60



- 1  
2  
3 Programme in Greenwich. 2011;:1–61.
- 4  
5 22 LGA - East Riding. Public health transformation twenty months on: adding value to  
6 tackle local health needs. Published Online First:  
7 2015.[http://www.local.gov.uk/documents/10180/6869714/L15\\_15+Public+health+tran](http://www.local.gov.uk/documents/10180/6869714/L15_15+Public+health+transformation+twenty+months+on_WEB_39693.pdf/7bb8060e-9a7b-4b85-8099-e854be74cfb5)  
8 [sformation+twenty+months+on\\_WEB\\_39693.pdf/7bb8060e-9a7b-4b85-8099-](http://www.local.gov.uk/documents/10180/6869714/L15_15+Public+health+transformation+twenty+months+on_WEB_39693.pdf/7bb8060e-9a7b-4b85-8099-e854be74cfb5)  
9 [e854be74cfb5](http://www.local.gov.uk/documents/10180/6869714/L15_15+Public+health+transformation+twenty+months+on_WEB_39693.pdf/7bb8060e-9a7b-4b85-8099-e854be74cfb5)  
10  
11  
12
- 13 23 Health Diagnostics. A Picture Of Health NHS Health Checks Case Study : Case study  
14 Introduction : National inequalities in health check provision. 2014.
- 15  
16 24 Taylor J, Krska J, MacKridge A. A community pharmacy-based cardiovascular  
17 screening service: Views of service users and the public. *Int J Pharm Pract*  
18 2012;**20**:277–84.
- 19  
20  
21 25 Corlett SA, Krska J. Evaluation of NHS Health Checks provided by community  
22 pharmacies. *J Public Health (Bangkok)* 2015;:1–8.
- 23  
24 26 Ismail H, Atkin K. The NHS Health Check programme: Insights from a qualitative  
25 study of patients. *Heal Expect* 2015;**19**:345–55.
- 26  
27  
28 27 Jenkinson CE, Asprey A, Clark CE, *et al.* Patients' willingness to attend the NHS  
29 cardiovascular health checks in primary care: a qualitative interview study. *BMC Fam*  
30 *Pract* 2015;**16**:33.
- 31  
32  
33 28 McNaughton RJ, Oswald NT, Shucksmith JS, *et al.* Making a success of providing  
34 NHS Health Checks in community pharmacies across the Tees Valley: a qualitative  
35 study. *BMC Health Serv Res* 2011;**11**:1–7.
- 36  
37  
38 29 Perry C, Thurston M, Alford S, *et al.* The NHS health check programme in England: a  
39 qualitative study. *Health Promot Int* 2014;**31**:106–15.
- 40  
41  
42 30 Riley R, Coghill N, Montgomery A, *et al.* Experiences of patients and healthcare  
43 professionals of NHS cardiovascular health checks: A qualitative study. *J Public*  
44 *Health (Bangkok)* 2015;**38**:543–51.
- 45  
46  
47 31 Riley R, Coghill N, Montgomery A, *et al.* The provision of NHS health checks in a  
48 community setting: an ethnographic account. *BMC Health Serv Res* 2015;**15**:1–10.
- 49  
50  
51 32 Shaw RL, Pattison HM, Holland C, *et al.* Be SMART: examining the experience of  
52 implementing the NHS Health Check in UK primary care. *BMC Fam Pract* 2015;**16**:1.
- 53  
54  
55 33 Alford S, Catherine P. Knowsley at Heart community NHS health checks : Behaviour  
56 change evaluation.  
57 2010.<http://chesterrep.openrepository.com/cdr/handle/10034/118071>
- 58  
59 34 Chipchase L, Hill P, Waterall J. An insight into the NHS Health Check Programme in  
60

- 1  
2  
3 Birmingham; Summar report. 2011.
- 4  
5 35 Oswald N, Mcnaughton R, Watson P, *et al.* Tees Vascular Assessment Programme  
6 Evaluation. 2010.
- 7  
8 36 Strutt E. *Patient-centred care: patients' experiences of and responses to the National*  
9 *Health Service (NHS) Health Check programme in general practice.*  
10 2011.<http://etheses.dur.ac.uk/3246>
- 11  
12 37 McNaughton RJ, Shucksmith J. Reasons for (non)compliance with intervention  
13 following identification of 'high-risk' status in the NHS Health Check programme. *J*  
14 *Public Heal (United Kingdom)* 2015;**37**:218–25.
- 15  
16 38 Britten N, Campbell R, Pope C, *et al.* Using meta ethnography to synthesise qualitative  
17 research: a worked example. *J Health Serv Res Policy* 2002;**7**:209–15.
- 18  
19 39 Groves RM, Peytcheva E. The impact of nonresponse rates on nonresponse bias: A  
20 meta-analysis. *Public Opin Q* 2008;**72**:167–89.
- 21  
22 40 Davern M. Nonresponse rates are a problematic indicator of nonresponse bias in  
23 survey research. *Health Serv Res* 2013;**48**:905–12.
- 24  
25 41 Cleary P. Satisfaction may not suffice!: a commentary on a patient's perspective. *Int J*  
26 *Tech Assess Heal Care* 1998;**14**:35–7.
- 27  
28 42 Salisbury C, Wallace M, Montgomery AA. Patients' experience and satisfaction in  
29 primary care: secondary analysis using multilevel modelling. *BMJ* 2010;**341**:c5004–  
30 c5004.
- 31  
32 43 Sitzia J, Wood N. Patient satisfaction: a review of issues and concepts. *Soc Sci Med*  
33 1997;**45**:1829–43.
- 34  
35 44 Althubaiti A. Information bias in health research: definition, pitfalls, and adjustment  
36 methods. *J Multidiscip Healthc* 2016;**9**:211–7.
- 37  
38 45 Roland M, Campbell J, Burt J. Improving patient experience in primary care: a multi-  
39 method programme of research on the measurement and improvement of patient  
40 experience. *NIHR PGfAR*;:In press.
- 41  
42 46 Dougall A, Russell A, Rubin G, *et al.* Rethinking patient satisfaction: patient  
43 experiences of an open access flexible sigmoidoscopy service. *Soc Sci Med*  
44 2000;**50**:53–62.
- 45  
46 47 Burt J, Newbould J, Abel G, *et al.* Investigating the meaning of 'good' or 'very good'  
47 patient evaluations of care in English general practice: a mixed methods study. *BMJ*  
48 *Open* 2017;:In press.
- 49  
50 48 Schneider H, Palmer N. Getting to the truth? Researching user views of primary health  
51  
52  
53  
54  
55  
56  
57  
58  
59  
60



- 1  
2  
3 care. *Health Policy Plan* 2002;**17**:32–41.
- 4  
5 49 Waldron C-A, van der Weijden T, Ludt S, *et al.* What are effective strategies to  
6 communicate cardiovascular risk information to patients? A systematic review. *Patient*  
7 *Educ Couns* 2011;**82**:169–81.
- 8  
9  
10 50 Zipkin DA, Umscheid CA, Keating NL, *et al.* Evidence-based risk communication: a  
11 systematic review. *Ann Intern Med* 2014;**161**:270–80.
- 12  
13 51 Hussein HM, Harris-Lane P, Abdelmoula MM, *et al.* Accuracy of self-perception of  
14 cardiovascular risk in the community. *J Vasc Interv Neurol* 2008;**1**:106–12.
- 15  
16 52 Avis NE, Smith KW, McKinlay JB. Accuracy of perceptions of heart attack risk: what  
17 influences perceptions and can they be changed? *Am J Public Health* 1989;**79**:1608–  
18 12.
- 19  
20  
21 53 National Institute for Health and Care Excellence. Public Health Guideline - Behaviour  
22 change: individual approaches. 2014. [www.nice.org.uk/guidance/ph49](http://www.nice.org.uk/guidance/ph49)
- 23  
24 54 Willis A, Davies M, Yates T, *et al.* Primary prevention of cardiovascular disease using  
25 validated risk scores: a systematic review. *J R Soc Med* 2012;**105**:348–56.
- 26  
27  
28 55 Fagerlin A, Zikmund-Fisher BJ, Ubel PA. Helping patients decide: Ten steps to better  
29 risk communication. *J Natl Cancer Inst* 2011;**103**:1436–43.
- 30  
31 56 Wells S, Kerr A, Eadie S, *et al.* ‘Your Heart Forecast’: a new approach for describing  
32 and communicating cardiovascular risk? *Heart* 2010;**96**:708–13.
- 33  
34  
35  
36  
37  
38  
39  
40  
41  
42  
43  
44  
45  
46  
47  
48  
49  
50  
51  
52  
53  
54  
55  
56  
57  
58  
59  
60

**Table 1.** Features of studies reporting results of participant surveys

| Study/ year                         | Type of article   | Setting                                                                                        | n         | Recruitment                                                                                                                                                           | Response rate (%) | Overall quality |
|-------------------------------------|-------------------|------------------------------------------------------------------------------------------------|-----------|-----------------------------------------------------------------------------------------------------------------------------------------------------------------------|-------------------|-----------------|
| Baker 2014 <sup>18</sup>            | Journal article   | 83 general practices                                                                           | 1,011     | Survey sent to all patients who had completed an NHS Health Check within a 2-month period                                                                             | 43                | High            |
| Corlett 2015 <sup>25</sup>          | Journal article   | Pharmacy-based NHS Health Checks                                                               | 66        | Survey sent to all those who had attended an NHS Health Check within a 4 week period                                                                                  | 35                | High            |
| Cowper 2013 <sup>19</sup>           | Case study        | NHS Health Checks in County Durham                                                             | 483       | No details provided                                                                                                                                                   | Not given         | Low             |
| Krska 2015 <sup>17</sup>            | Journal article   | 16 general practices in North West England                                                     | 434       | All patients with estimated 10-year CVD risk > 20% from the 16 practices were sent a postal survey regardless of whether they had attended an NHS Health Check or not | 23.4              | High            |
| LGA – East Riding <sup>22</sup>     | Case study        | Outreach NHS Health Check clinics at leisure centres, community centres and workplace settings | Not given | No details provided                                                                                                                                                   | Not given         | Low             |
| NHS Greenwich <sup>21</sup>         | Evaluation report | Outreach clinics                                                                               | 540       | Questionnaire distributed at community NHS Health Check venues                                                                                                        | Not given         | Medium          |
| NHS Greenwich <sup>21</sup>         | Evaluation report | Outreach clinics                                                                               | 72        | Questionnaire distributed at community NHS Health Check venues                                                                                                        | Not given         | Medium          |
| ‘A picture of Health’ <sup>23</sup> | Case study        | General practice-based pilot of point-of-care NHS Health Checks in Tyne and Wear               | 281       | No details provided                                                                                                                                                   | Not given         | Low             |
| Taylor 2012 <sup>24</sup>           | Journal article   | Pharmacy-based NHS Health Checks                                                               | 97        | Pharmacists gave invitation packs to all those who attended an NHS Health Check during the first six months                                                           | 37.4              | High            |
| Trivedy 2016 <sup>20</sup>          | Journal article   | Outreach NHS Health Check clinics at cricket grounds                                           | 513       | Participants were asked to complete an anonymous questionnaire immediately after their NHS Health Check                                                               | Not given         | Medium          |

**Table 2.** Findings from studies reporting results of participant surveys

| Domain                               | Result                                                                                                                                                                                                                                                                                                                                                                                                                                                                                                                                                                                              |
|--------------------------------------|-----------------------------------------------------------------------------------------------------------------------------------------------------------------------------------------------------------------------------------------------------------------------------------------------------------------------------------------------------------------------------------------------------------------------------------------------------------------------------------------------------------------------------------------------------------------------------------------------------|
| Overall experience / satisfaction    | 91.7% rated the overall experience highly <sup>18</sup><br>Almost all viewed their experience positively <sup>25</sup><br>92% rated experience as good or very good <sup>22</sup><br>Almost all reported a positive experience <sup>24</sup><br>83% rated their experience as excellent <sup>20</sup><br>82.2% were very satisfied <sup>19</sup><br>97% satisfied or very satisfied overall <sup>21</sup><br>95% satisfied or very satisfied <sup>21</sup><br>'High levels' of satisfaction <sup>23</sup>                                                                                           |
| Recommend to others                  | 99.6% would recommend to others <sup>19</sup><br>78% likely to recommend to others <sup>23</sup><br>100% would recommend to others <sup>20</sup>                                                                                                                                                                                                                                                                                                                                                                                                                                                    |
| Benefit                              | 99% felt they had benefited <sup>24</sup><br>85.6% felt they had benefited <sup>17</sup><br>90.2% felt the NHS Health Check was worth attending <sup>18</sup><br>90% likely or very likely to return if invited back <sup>21</sup>                                                                                                                                                                                                                                                                                                                                                                  |
| Time / opportunity to ask questions  | 88.0% agreed they had the time to ask questions <sup>18</sup><br>92% felt they were given enough time <sup>25</sup><br>94% were able to ask all their questions <sup>25</sup><br>99.7% felt they were given enough time <sup>24</sup><br>89.6% felt they were given enough time <sup>17</sup><br>90.2% were able to ask all their questions <sup>17</sup><br>9% had unanswered questions <sup>25</sup><br>10.8% had unanswered questions <sup>24</sup><br>14.7% still had questions about their risk of heart disease <sup>17</sup><br>7.4% had concerns that had not been dealt with <sup>17</sup> |
| Understanding and recall of CVD risk | 97% understood everything <sup>25</sup><br>59% could recall their actual CVD score <sup>25</sup><br>91.9% understood everything discussed <sup>17</sup><br>83% felt the Health Check had helped them to understand their risk of heart disease <sup>17</sup><br>61.9% rated their understanding of the CVD risk score highly <sup>18</sup>                                                                                                                                                                                                                                                          |
| Location and timing of appointments  | 69.5% rated the location of Doctor's surgery highly <sup>18</sup><br>70.7% rated the time and availability of appointments highly <sup>18</sup><br>93.8% agreed that screening had been done in a suitable place <sup>24</sup><br>86% felt the location gave enough privacy <sup>20</sup>                                                                                                                                                                                                                                                                                                           |
| Staff                                | 93.8% rated confidence in staff knowledge <sup>18</sup><br>92% reported that staff were helpful, friendly and clear about the service during their Health Check <sup>22</sup><br>100% felt they were treated with dignity <sup>20</sup><br>99% felt comfortable discussing their lifestyle <sup>24</sup><br>93.6% felt comfortable discussing their lifestyle <sup>17</sup><br>13.5% would have liked more support changing lifestyle <sup>17</sup>                                                                                                                                                 |

**Table 3.** Features of qualitative studies describing patient experiences of NHS Health Checks

| Author, year                        | Type of report    | Location of study         | Setting of NHS Health Check | Data collection method                                               | Setting for data collection             | n                                                        | Method of recruitment to study                                                                                                                                                  | Participant characteristics                                                                           | Method of analysis                         | Overall quality |
|-------------------------------------|-------------------|---------------------------|-----------------------------|----------------------------------------------------------------------|-----------------------------------------|----------------------------------------------------------|---------------------------------------------------------------------------------------------------------------------------------------------------------------------------------|-------------------------------------------------------------------------------------------------------|--------------------------------------------|-----------------|
| Alford 2010 <sup>33</sup>           | Evaluation report | Knowsley                  | Community                   | Interviews and focus groups                                          | Not given                               | 36                                                       | No details given                                                                                                                                                                | 19 female, 17 male<br>13 high risk score, 23 low risk score                                           | Thematic analysis                          | Medium          |
| Baker 2014 <sup>18</sup>            | Journal article   | Gloucester                | 83 general practices        | Content analysis of cross-sectional survey                           | N/A                                     | 1,011 (43%)                                              | Survey sent to all patients who had completed an NHS Health Check within a 2 month period                                                                                       | 55.2% female<br>19% 56-60 years<br>10.8% 40-45 years<br>96% white British                             | Thematic analysis                          | High            |
| Chipchase 2011 <sup>34</sup>        | Report            | East and North Birmingham | 2 general practices         | Face-to-face semi-structured interviews                              | GP surgery                              | 10                                                       | Attendees to NHS Health Checks in the first two weeks of February 2011 received a recruitment letter                                                                            | 8 female, 2 male                                                                                      | Interpretative phenomenological analysis   | High            |
| Corlett 2015 <sup>25</sup>          | Journal article   | London                    | 4 pharmacies                | Telephone interviews with sample of survey respondents               | On the telephone                        | 19                                                       | Invitation for a semi-structured telephone interview included with survey sent to all those who had attended an NHS Health Check within a 4 week period                         | Not given                                                                                             | Thematic analysis using framework approach | Medium          |
| Greenwich 2011 <sup>21</sup>        | Report            | Greenwich                 | Community                   | Open ended questionnaire, focus groups and in-depth phone interviews | Not given                               | 612 survey responses<br>4 focus groups and 31 interviews | Recruited from community outreach services providing NHS Health Checks                                                                                                          | Ethnic minority participants: 42% female                                                              | Based on Health Belief Model               | Medium          |
| Ismail and Atkin 2015 <sup>26</sup> | Journal article   | Not specified             | General practices           | Semi-structured interviews                                           | Participants' homes or NHS premises     | 45 baseline<br>38 follow-up                              | Purposive sampling from a list provided by 5 participating general practices                                                                                                    | 21 female, 24 male.<br>Average age: 58.<br>Ethnicity: 37 White, 5 South Asian and 3 African Caribbean | Framework analysis                         | High            |
| Jenkinson 2015 <sup>27</sup>        | Journal article   | Torbay                    | 4 general practices         | Telephone or face-to-face interviews                                 | On the telephone or participants' homes | 17                                                       | Letters of invitation sent to a random sample identified by general practices from lists stratified by age and gender of those who had not responded to an invitation to an NHS | 12 females, 5 males<br>6 employed, 1 unemployed, 10 retired                                           | Thematic analysis                          | High            |

| Author, year                  | Type of report    | Location of study                             | Setting of NHS Health Check     | Data collection method                 | Setting for data collection             | n           | Method of recruitment to study                                                                                                                                                                                                                            | Participant characteristics                                                                                                                                                   | Method of analysis          | Overall quality |
|-------------------------------|-------------------|-----------------------------------------------|---------------------------------|----------------------------------------|-----------------------------------------|-------------|-----------------------------------------------------------------------------------------------------------------------------------------------------------------------------------------------------------------------------------------------------------|-------------------------------------------------------------------------------------------------------------------------------------------------------------------------------|-----------------------------|-----------------|
| Krska 2015 <sup>17</sup>      | Journal article   | Sefton, an area of North West England         | 16 general practices            | Postal survey with free text responses | N/A                                     | 434 (23.4%) | Health Check within 4 weeks.<br>All patients with estimated 10 year CVD risk > 20% from the 16 practices were sent a postal survey regardless of whether they had attended an NHS Health Check or not                                                     | 19% female<br>68.2% over 65<br>99.5% white<br>7.7% highest quintile of deprivation<br>13.7% lowest quintile                                                                   | Categorisation of responses | Medium          |
| McNaughton 2015 <sup>37</sup> | Journal article   | North East of England (non-specific location) | 5 general practices             | Semi-structured interviews             | Not given                               | 29          | Invitations to patients from five general practices who had received an NHS Health Check and had an estimated 10 year CVD risk >20%                                                                                                                       | 10 females, 19 males<br>24 over 65 years<br>13 in least deprived quintile                                                                                                     | Thematic analysis           | High            |
| Oswald 2010 <sup>35</sup>     | Evaluation report | Teesside                                      | General practices or pharmacies | Telephone semi-structured interviews   | On the telephone                        | 8           | Invited by general practices or pharmacies or from a list of patients who had attended an NHS Health Check and agreed to take part in the service evaluation                                                                                              | 6 had attended general practices and 2 pharmacies                                                                                                                             | Thematic analysis           | Medium          |
| Perry 2014 <sup>29</sup>      | Journal article   | Knowsley                                      | Community                       | Interviews and focus groups            | Not given                               | 36          | Letter or telephone invitation to all 38 people who were at high risk of CVD and had attended an NHS Health Check in the past 12-18 months were invited. The remaining attendees at low risk of CVD were purposively sampled for gender, age, risk score. | 3 focus groups: 1 for high risk scores (6 males), 2 for low risk scores (17 females and 7 males)<br>6 semi-structured interviews (2 females and 4 males with high risk score) | Thematic analysis           | High            |
| Riley 2015 <sup>31</sup>      | Journal article   | Bristol inner-city                            | Community                       | Semi-structured interviews             | Community venues or participants' homes | 16          | Participants were recruited via their attendance of community outreach events.                                                                                                                                                                            | 7 females, 9 males<br>All from black and minority ethnic populations                                                                                                          | Thematic analysis           | High            |
| Riley 2015 <sup>30</sup>      | Journal article   | Bristol                                       | General practices               | Face-to-face and telephone             | On the telephone or                     | 28          | Purposive sampling from those identified through a                                                                                                                                                                                                        | 16 females, 12 males<br>23 White British                                                                                                                                      | Thematic analysis           | High            |

| Author, year              | Type of report  | Location of study            | Setting of NHS Health Check     | Data collection method                  | Setting for data collection | <i>n</i> | Method of recruitment to study                                                                             | Participant characteristics                                              | Method of analysis | Overall quality |
|---------------------------|-----------------|------------------------------|---------------------------------|-----------------------------------------|-----------------------------|----------|------------------------------------------------------------------------------------------------------------|--------------------------------------------------------------------------|--------------------|-----------------|
|                           |                 |                              |                                 | semi-structured interviews              | in participants' homes      |          | search of patient records for patients who had undertaken an NHS Health Check within the previous 6 months | 11 most deprived quintile<br>11 high (>20%) CVD risk                     |                    |                 |
| Shaw 2015 <sup>32</sup>   | Journal article | Birmingham and Black Country | General practices and community | Semi-structured interviews              | Not given                   | 23       | Patients who had attended an NHS Health Check were invited by practice managers or lead clinicians         | High black and minority ethnic population and high levels of deprivation | Thematic analysis  | High            |
| Strutt 2011 <sup>36</sup> | Masters thesis  | Darlington, Co. Durham, UK   | 2 general practices             | Semi-structured face-to-face interviews | Participants' homes         | 16       | Invitation letters or telephone                                                                            | 7 females, 9 males<br>White, South-Asian, and Middle Eastern             | Thematic analysis  | High            |

**Table 4.** Studies contributing to each of the qualitative themes

|                                     | Unmet expectations | Limited understanding of the risk score | Preference for better information | Potential trigger for behaviour change | Confusion around follow-up |
|-------------------------------------|--------------------|-----------------------------------------|-----------------------------------|----------------------------------------|----------------------------|
| Alford 2010 <sup>33</sup>           |                    |                                         | •                                 | •                                      | •                          |
| Baker 2014 <sup>18</sup>            | •                  | •                                       | •                                 | •                                      |                            |
| Chipchase 2011 <sup>34</sup>        | •                  | •                                       | •                                 | •                                      |                            |
| Corlett 2015 <sup>25</sup>          |                    | •                                       | •                                 | •                                      |                            |
| Greenwich 2011 <sup>21</sup>        |                    |                                         | •                                 | •                                      | •                          |
| Ismail and Atkin 2015 <sup>26</sup> | •                  | •                                       |                                   | •                                      | •                          |
| Jenkinson 2015 <sup>27</sup>        |                    | •                                       |                                   |                                        |                            |
| Krska 2015 <sup>17</sup>            | •                  | •                                       |                                   |                                        |                            |
| McNaughton 2015 <sup>37</sup>       |                    |                                         | •                                 | •                                      |                            |
| Oswald 2010 <sup>35</sup>           | •                  |                                         |                                   |                                        | •                          |
| Perry 2014 <sup>29</sup>            |                    | •                                       | •                                 | •                                      |                            |
| Riley 2015 <sup>31</sup>            |                    | • (a)                                   | •                                 | •                                      |                            |
| Riley 2015 <sup>30</sup>            | • (b)              |                                         |                                   |                                        |                            |
| Shaw 2015 <sup>32</sup>             |                    | •                                       | •                                 | •                                      | •                          |
| Strutt 2011 <sup>36</sup>           | •                  | •                                       | •                                 | •                                      |                            |

**Box 1.** Reasons provided by participants for not making lifestyle changes

- Older participants feeling that making changes to their lifestyle was unnecessary<sup>37</sup>
- Healthy eating information was too generic<sup>37</sup>
- Guidance they had been given was likely to be subject to change<sup>37</sup>
- Co-morbidities which made physical activity difficult<sup>37</sup>
- Psychosocial circumstances, e.g. bereavement, stress or socio-economic barriers, such as shift work or unemployment<sup>29,30</sup>
- Having previously been offered a behaviour intervention strategy<sup>26</sup>
- Cost of eating fresh fruit and vegetables<sup>26</sup>
- Difficulty incorporating changes into their daily lives<sup>29</sup>
- Underlying medical conditions<sup>29</sup>

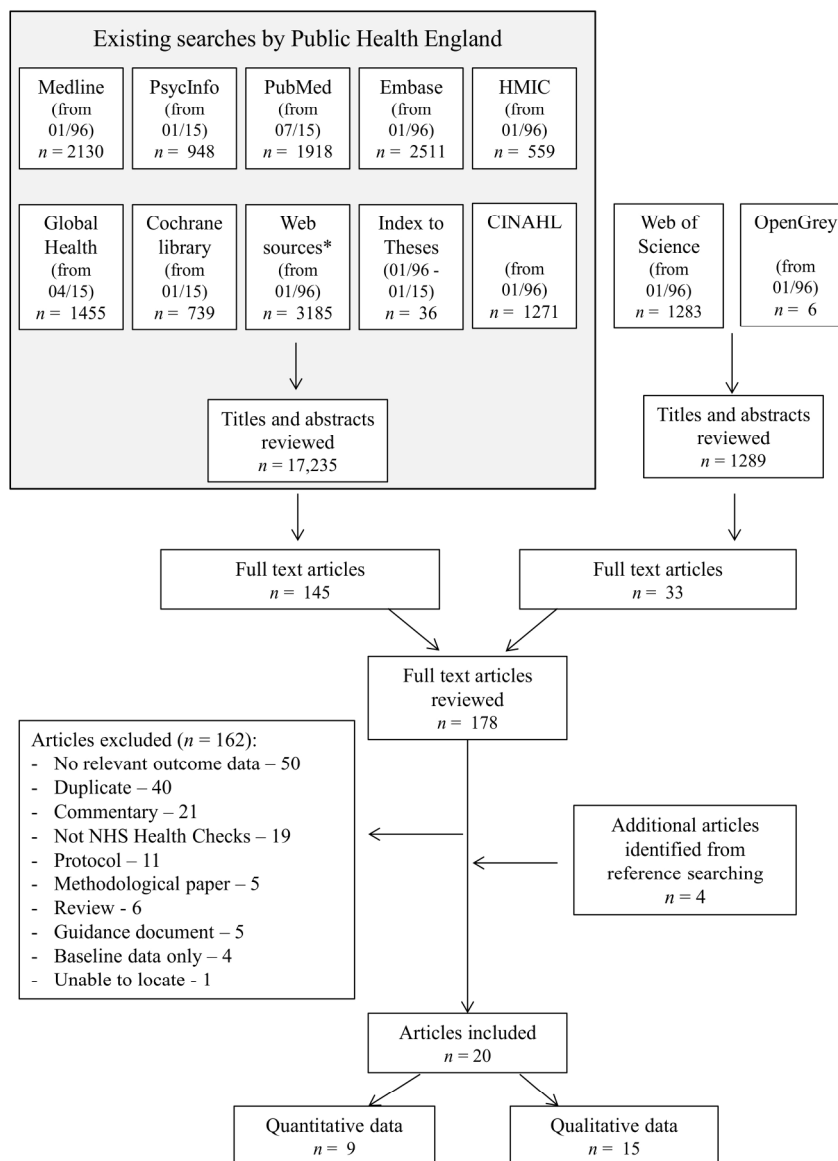

Figure 1. PRISMA diagram

231x308mm (300 x 300 DPI)



1  
2  
3 **Appendix 1 – Search strategies**  
4  
5  
6

7

| Database     | Search strategy                                                                                                                                                                                                                                                                                                                                                                                                                                                                                                                                                                                                                                                                                                                                                                                              |
|--------------|--------------------------------------------------------------------------------------------------------------------------------------------------------------------------------------------------------------------------------------------------------------------------------------------------------------------------------------------------------------------------------------------------------------------------------------------------------------------------------------------------------------------------------------------------------------------------------------------------------------------------------------------------------------------------------------------------------------------------------------------------------------------------------------------------------------|
| Ovid Medline | <p>8</p> <p>9 1. health check*.tw.</p> <p>10 2. (diabetes adj3 screen*).tw.</p> <p>11 3. (cardiovascular adj3 screen*).tw.</p> <p>12 4. (population adj2 screen*).tw.</p> <p>13 5. (risk factor adj3 screen*).tw.</p> <p>14 6. (opportunistic adj3 screen*).tw.</p> <p>15 7. medical check*.tw.</p> <p>16 8. general check*.tw.</p> <p>17 9. periodic health exam*.tw.</p> <p>18 10. annual exam*.tw.</p> <p>19 11. annual review*.tw.</p> <p>20 12. NHSHC.tw.</p> <p>21 13. 1 or 2 or 3 or 4 or 5 or 6 or 7 or 8 or 9 or 10 or 11 or 12</p> <p>22 14. cardiovascular adj3 prevention.tw.</p> <p>23 15. (primary care or general practice or primary healthcare).tw</p> <p>24 16. 14 and 15</p> <p>25 17. Cardiovascular Diseases/ AND Primary Prevention/</p> <p>26 18. 16 or 17</p> <p>27 19. 13 or 18</p> |
| PubMed       | <p>28</p> <p>29 1. health check*</p> <p>30 2. diabetes screen*</p> <p>31 3. cardiovascular screen*</p> <p>32 4. population screen*</p> <p>33 5. risk factor screen*</p> <p>34 6. opportunistic screen*</p> <p>35 7. medical check*</p> <p>36 8. general check*</p> <p>37 9. periodic health exam*</p> <p>38 10. annual exam*</p> <p>39 11. annual review*</p> <p>40 12. NHSHC</p> <p>41 13. 1 or 2 or 3 or 4 or 5 or 6 or 7 or 8 or 9 or 10 or 11 or 12</p> <p>42 14. Cardiovascular Diseases AND Primary Prevention[MeSH Terms]</p> <p>43 15. "primary care"[Text Word] OR "general practice"[Text Word] OR</p> <p>44 "primary healthcare"[Text Word])</p> <p>45 16. (cardiovascular[Text Word] AND prevention[Text Word])</p> <p>46 17. #15 and #16</p> <p>47 18. #14 or #17</p> <p>48 19. #13 or #18</p>  |
| Ovid Embase  | <p>49</p> <p>50 1. health check*.tw.</p> <p>51 2. (diabetes adj3 screen*).tw.</p> <p>52 3. (cardiovascular adj3 screen*).tw.</p> <p>53 4. (population adj2 screen*).tw.</p> <p>54</p> <p>55</p> <p>56</p> <p>57</p> <p>58</p> <p>59</p> <p>60</p>                                                                                                                                                                                                                                                                                                                                                                                                                                                                                                                                                            |

- 1  
2  
3  
4 5. (risk factor adj3 screen\*).tw.  
5 6. (opportunistic adj3 screen\*).tw.  
6 7. medical check\*.tw.  
7 8. general check\*.tw.  
8 9. periodic health exam\*.tw.  
9 10. annual exam\*.tw.  
10 11. annual review\*.tw.  
11 12. NHSHC.tw.  
12 13. periodic medical examination/  
13 14. 1 or 2 or 3 or 4 or 5 or 6 or 7 or 8 or 9 or 10 or 11 or 12 or 13  
14 15. cardiovascular adj3 prevention.tw.  
15 16. (primary care or general practice or primary healthcare).tw  
16 17. 15 and 16  
17 18. cardiovascular disease/ AND primary prevention/  
18 19. 17 or 18  
19 20. 14 or 19  
20  
21  
22  
23  
24 Ovid HMIC 1 "health check\*".af.  
25 2 health checks/  
26 3 (cardiovascular or vascular or heart or diabetes or stroke).af.  
27 4 (screen\* or risk).af.  
28 5 3 AND 4  
29 6 1 OR 2 or 5  
30 7 cardiovascular adj3 prevention.tw.  
31 8 (primary care or general practice or primary healthcare).tw  
32 9 7 and 8  
33 10 Cardiovascular diseases/ AND exp preventive medicine/  
34 11 9 or 10  
35 12 6 or 11  
36  
37  
38  
39 EBSCO S10 S1 OR S2 OR S9  
40 CINAHL S9 S5 OR S8  
41 S8 S6 AND S7  
42 S7 (MH "Preventive Health Care+")  
43 S6 (MH "Cardiovascular Diseases+")  
44 S5 S3 AND S4  
45 S4 "primary care" or "general practice" or "primary healthcare"  
46 S3 TX cardiovascular N3 prevention  
47 S2 (diabetes N3 screen\*) OR (cardiovascular N3 screen\*) OR  
48 (population N2 screen\*) OR (risk factor N3 screen\*) OR (opportunistic  
49 N3 screen\*) OR "medical check\*" OR "general check\*" OR "periodic  
50 health exam\*" OR "annual exam\*" OR "annual review\*" OR NHSHC  
51 S1 health check\*  
52  
53  
54  
55 EBSCO Global S10 S6 OR S19 OR S3 Limiters - Publication Year: 2016  
56 Health S9 S7 AND S8  
57 S8 DE "preventive medicine"  
58 S7 DE "cardiovascular diseases"  
59 S6 S4 AND S5  
60 S5 "primary care" or "general practice" or "primary healthcare"

1  
2  
3  
4  
5  
6  
7  
8  
9  
10  
11  
12  
13  
14  
15  
16  
17  
18  
19  
20  
21  
22  
23  
24  
25  
26  
27  
28  
29  
30  
31  
32  
33  
34  
35  
36  
37  
38  
39  
40  
41  
42  
43  
44  
45  
46  
47  
48  
49  
50  
51  
52  
53  
54  
55  
56  
57  
58  
59  
60

S4 TX cardiovascular N3 prevention  
S3 S1 OR S2  
S2 (diabetes N3 screen\*) OR (cardiovascular N3 screen\*) OR  
(population N2 screen\*) OR (risk factor N3 screen\*) OR (opportunistic  
N3 screen\*) OR "medical check\*" OR "general check\*" OR "periodic  
health exam\*" OR "annual exam\*" OR "annual review\*" OR NHSHC  
S1 health check\*

HDAS PsycInfo 1 "health check\*".af.  
2 PHYSICAL EXAMINATION/  
3 HEALTH SCREENING/  
4 "diabetes screen\*".af  
5 "cardiovascular screen\*".af  
6 "population screen\*".af  
7 ("opportunistic\* screen\*" OR "risk factor screen\*").af  
8 ("medical check\*" OR "general check\*" OR "periodic health exam\*" OR "annual exam\*" OR "annual review\*" OR NHSHC).af  
9 1 OR 2 OR 3 OR 4 OR 5 OR 6 OR 7 OR 8  
10 cardiovascular.ti,ab  
11 prevention.ti,ab  
12 10 AND 11  
13 CARDIOVASCULAR DISORDERS/  
14 PREVENTIVE MEDICINE/  
15 13 AND 14  
16 12 OR 15  
17 9 OR 16

Web of Science, Science Citation Index "health check\*" OR "diabetes screen\*" OR "cardiovascular screen\*" OR "population screen\*" OR "risk factor screen\*" OR "Opportunistic screen\*" OR "medical check\*" OR "general check\*" OR "periodic health exam\*" OR "annual exam\*" OR "annual review\*" OR NHSHC  
OR  
(Cardiovascular NEAR/3 prevention) AND ("primary care" OR "general practice" OR "primary healthcare")  
Limit to: England, Scotland, Wales, North Ireland

Cochrane Library (Wiley) #1 "health check\*"  
#2 (diabetes next/3 screen\*) or (cardiovascular next/3 screen\*) or (population next/2 screen\*) or (opportunistic next/2 screen\*) or ("risk factor" next/3 screen\*) or "medical check\*" or "general check\*" or "periodic health exam\*" or "annual exam\*" or "annual review\*" or NHSHC  
#3 cardiovascular adj3 prevention.tw.  
#4 (primary care or general practice or primary healthcare).tw  
#5 #3 and #4  
#6 MeSH descriptor: [Cardiovascular Diseases] this term only  
#7 MeSH descriptor: [Primary Prevention] explode all trees  
#8 #6 and #7  
#9 #5 or #8  
#10 #1 or #2 or #9

1  
2  
3  
4 NHS Evidence “health check\*” OR cardiovascular prevention primary care  
5  
6  
7 TRIP database “health check\*” OR cardiovascular prevention primary care  
8  
9 Google Scholar "nhs health check"  
10 cardiovascular “health check”  
11 cardiovascular prevention “primary care”  
12  
13  
14 Google "nhs health check"  
15 cardiovascular prevention “primary care”  
16 cardiovascular “health check”  
17  
18  
19 Clinical “health check”  
20 trials.gov and  
21 ISRCND registry  
22  
23  
24  
25  
26  
27  
28  
29  
30  
31  
32  
33  
34  
35  
36  
37  
38  
39  
40  
41  
42  
43  
44  
45  
46  
47  
48  
49  
50  
51  
52  
53  
54  
55  
56  
57  
58  
59  
60

Appendix 2 – Quality assessment of quantitative studies

| Author, date           | Study addressed a clearly focused issue | Use of an appropriate method | Recruitment | Exposure measurement | Outcome measurement | Confounding factors | Applicability to England | Overall |
|------------------------|-----------------------------------------|------------------------------|-------------|----------------------|---------------------|---------------------|--------------------------|---------|
| Baker 2014             | ●                                       | ●                            | ●           | ●                    | ●                   | ●                   | ●                        | High    |
| Corlett 2015           | ●                                       | ●                            | ●           | ●                    | ●                   | ●                   | ●                        | High    |
| Cowper 2013            | ●                                       | ●                            | ●           | ●                    | ●                   | ●                   | ●                        | Low     |
| Krska 2015             | ●                                       | ●                            | ●           | ●                    | ●                   | ●                   | ●                        | High    |
| LGA – East Riding 2015 | ●                                       | ●                            | ●           | ●                    | ●                   | ●                   | ●                        | Low     |
| NHS Greenwich          | ●                                       | ●                            | ●           | ●                    | ●                   | ●                   | ●                        | Medium  |
| ‘A picture of Health’  | ●                                       | ●                            | ●           | ●                    | ●                   | ●                   | ●                        | Low     |
| Taylor 2012            | ●                                       | ●                            | ●           | ●                    | ●                   | ●                   | ●                        | High    |
| Trivedy 2016           | ●                                       | ●                            | ●           | ●                    | ●                   | ●                   | ●                        | Medium  |

● Low ● Medium ● High

For peer review only

1  
2  
3  
4  
5  
6  
7  
8  
9  
10  
11  
12  
13  
14  
15  
16  
17  
18  
19  
20  
21  
22  
23  
24  
25  
26  
27  
28  
29  
30  
31  
32  
33  
34  
35  
36  
37  
38  
39  
40  
41  
42  
43  
44  
45  
46  
47

### Appendix 3 – Quality assessment of qualitative studies

| Author and date       | Study addressed a clearly focused issue | Appropriateness of qualitative method | Design | Recruitment | Consideration of relationship between research and participants | Ethical issues | Rigor of data analysis | Clarity of statement of findings | Overall |
|-----------------------|-----------------------------------------|---------------------------------------|--------|-------------|-----------------------------------------------------------------|----------------|------------------------|----------------------------------|---------|
| Alford 2010           | ●                                       | ●                                     | ●      | ●           | ●                                                               | ●              | ●                      | ●                                | Medium  |
| Baker 2014            | ●                                       | ●                                     | ●      | ●           | n/a                                                             | ●              | ●                      | ●                                | High    |
| Chipchase 2011        | ●                                       | ●                                     | ●      | ●           | ●                                                               | ●              | ●                      | ●                                | High    |
| Corlett 2015          | ●                                       | ●                                     | ●      | ●           | ●                                                               | ●              | ●                      | ●                                | Medium  |
| Greenwich 2011        | ●                                       | ●                                     | ●      | ●           | ●                                                               | ●              | ●                      | ●                                | Medium  |
| Ismail and Atkin 2015 | ●                                       | ●                                     | ●      | ●           | ●                                                               | ●              | ●                      | ●                                | High    |
| Jenkinson 2015        | ●                                       | ●                                     | ●      | ●           | ●                                                               | ●              | ●                      | ●                                | High    |
| Krska 2015            | ●                                       | ●                                     | ●      | ●           | n/a                                                             | ●              | ●                      | ●                                | Medium  |
| McNaughton 2015       | ●                                       | ●                                     | ●      | ●           | ●                                                               | ●              | ●                      | ●                                | High    |
| Oswald 2010           | ●                                       | ●                                     | ●      | ●           | ●                                                               | ●              | ●                      | ●                                | Medium  |
| Perry 2014            | ●                                       | ●                                     | ●      | ●           | ●                                                               | ●              | ●                      | ●                                | High    |
| Riley 2015 (JPH)      | ●                                       | ●                                     | ●      | ●           | ●                                                               | ●              | ●                      | ●                                | High    |
| Riley 2015 (BMC HSR)  | ●                                       | ●                                     | ●      | ●           | ●                                                               | ●              | ●                      | ●                                | High    |
| Shaw 2015             | ●                                       | ●                                     | ●      | ●           | ●                                                               | ●              | ●                      | ●                                | High    |
| Strutt 2011           | ●                                       | ●                                     | ●      | ●           | ●                                                               | ●              | ●                      | ●                                | High    |

● Low ● Medium ● High

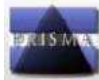

# PRISMA 2009 Checklist

| Section/topic                      | #  | Checklist item                                                                                                                                                                                                                                                                                              | Reported on page # |
|------------------------------------|----|-------------------------------------------------------------------------------------------------------------------------------------------------------------------------------------------------------------------------------------------------------------------------------------------------------------|--------------------|
| <b>TITLE</b>                       |    |                                                                                                                                                                                                                                                                                                             |                    |
| Title                              | 1  | Identify the report as a systematic review, meta-analysis, or both.                                                                                                                                                                                                                                         | 1                  |
| <b>ABSTRACT</b>                    |    |                                                                                                                                                                                                                                                                                                             |                    |
| Structured summary                 | 2  | Provide a structured summary including, as applicable: background; objectives; data sources; study eligibility criteria, participants, and interventions; study appraisal and synthesis methods; results; limitations; conclusions and implications of key findings; systematic review registration number. | 2                  |
| <b>INTRODUCTION</b>                |    |                                                                                                                                                                                                                                                                                                             |                    |
| Rationale                          | 3  | Describe the rationale for the review in the context of what is already known.                                                                                                                                                                                                                              | 4                  |
| Objectives                         | 4  | Provide an explicit statement of questions being addressed with reference to participants, interventions, comparisons, outcomes, and study design (PICOS).                                                                                                                                                  | 4                  |
| <b>METHODS</b>                     |    |                                                                                                                                                                                                                                                                                                             |                    |
| Protocol and registration          | 5  | Indicate if a review protocol exists, if and where it can be accessed (e.g., Web address), and, if available, provide registration information including registration number.                                                                                                                               | 5                  |
| Eligibility criteria               | 6  | Specify study characteristics (e.g., PICOS, length of follow-up) and report characteristics (e.g., years considered, language, publication status) used as criteria for eligibility, giving rationale.                                                                                                      | 5                  |
| Information sources                | 7  | Describe all information sources (e.g., databases with dates of coverage, contact with study authors to identify additional studies) in the search and date last searched.                                                                                                                                  | 5                  |
| Search                             | 8  | Present full electronic search strategy for at least one database, including any limits used, such that it could be repeated.                                                                                                                                                                               | Appendix 1         |
| Study selection                    | 9  | State the process for selecting studies (i.e., screening, eligibility, included in systematic review, and, if applicable, included in the meta-analysis).                                                                                                                                                   | 5                  |
| Data collection process            | 10 | Describe method of data extraction from reports (e.g., piloted forms, independently, in duplicate) and any processes for obtaining and confirming data from investigators.                                                                                                                                  | 5/6                |
| Data items                         | 11 | List and define all variables for which data were sought (e.g., PICOS, funding sources) and any assumptions and simplifications made.                                                                                                                                                                       | Table 1 and 2      |
| Risk of bias in individual studies | 12 | Describe methods used for assessing risk of bias of individual studies (including specification of whether this was done at the study or outcome level), and how this information is to be used in any data synthesis.                                                                                      | 6                  |
| Summary measures                   | 13 | State the principal summary measures (e.g., risk ratio, difference in means).                                                                                                                                                                                                                               | 6                  |
| Synthesis of results               | 14 | Describe the methods of handling data and combining results of studies, if done, including measures of consistency (e.g., I <sup>2</sup> ) for each meta-analysis. <a href="http://bmjopen.bmj.com/site/about/guidelines.xhtml">http://bmjopen.bmj.com/site/about/guidelines.xhtml</a>                      | 6                  |

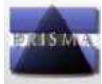

# PRISMA 2009 Checklist

Page 1 of 2

| Section/topic                 | #  | Checklist item                                                                                                                                                                                           | Reported on page #           |
|-------------------------------|----|----------------------------------------------------------------------------------------------------------------------------------------------------------------------------------------------------------|------------------------------|
| Risk of bias across studies   | 15 | Specify any assessment of risk of bias that may affect the cumulative evidence (e.g., publication bias, selective reporting within studies).                                                             | 5                            |
| Additional analyses           | 16 | Describe methods of additional analyses (e.g., sensitivity or subgroup analyses, meta-regression), if done, indicating which were pre-specified.                                                         | N/A                          |
| <b>RESULTS</b>                |    |                                                                                                                                                                                                          |                              |
| Study selection               | 17 | Give numbers of studies screened, assessed for eligibility, and included in the review, with reasons for exclusions at each stage, ideally with a flow diagram.                                          | 6 and Fig 1                  |
| Study characteristics         | 18 | For each study, present characteristics for which data were extracted (e.g., study size, PICOS, follow-up period) and provide the citations.                                                             | Table 1 and 2                |
| Risk of bias within studies   | 19 | Present data on risk of bias of each study and, if available, any outcome level assessment (see item 12).                                                                                                | Table 1 and 2 and Appendix 2 |
| Results of individual studies | 20 | For all outcomes considered (benefits or harms), present, for each study: (a) simple summary data for each intervention group (b) effect estimates and confidence intervals, ideally with a forest plot. | N/A                          |
| Synthesis of results          | 21 | Present results of each meta-analysis done, including confidence intervals and measures of consistency.                                                                                                  | N/A                          |
| Risk of bias across studies   | 22 | Present results of any assessment of risk of bias across studies (see Item 15).                                                                                                                          | N/A                          |
| Additional analysis           | 23 | Give results of additional analyses, if done (e.g., sensitivity or subgroup analyses, meta-regression [see Item 16]).                                                                                    | N/A                          |
| <b>DISCUSSION</b>             |    |                                                                                                                                                                                                          |                              |
| Summary of evidence           | 24 | Summarize the main findings including the strength of evidence for each main outcome; consider their relevance to key groups (e.g., healthcare providers, users, and policy makers).                     | 11                           |
| Limitations                   | 25 | Discuss limitations at study and outcome level (e.g., risk of bias), and at review-level (e.g., incomplete retrieval of identified research, reporting bias).                                            | 12                           |
| Conclusions                   | 26 | Provide a general interpretation of the results in the context of other evidence, and implications for future research.                                                                                  | 13/14                        |
| <b>FUNDING</b>                |    |                                                                                                                                                                                                          |                              |
| Funding                       | 27 | Describe sources of funding for the systematic review and other support (e.g., supply of data); role of funders for the systematic review.                                                               | 14/15                        |



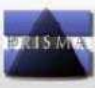

# PRISMA 2009 Checklist

1  
2  
3  
4  
5  
6  
7  
8  
9  
10  
11  
12  
13  
14  
15  
16  
17  
18  
19  
20  
21  
22  
23  
24  
25  
26  
27  
28  
29  
30  
31  
32  
33  
34  
35  
36  
37  
38  
39  
40  
41  
42  
43  
44  
45  
46  
47  
48  
49

From: Moher D, Liberati A, Tetzlaff J, Altman DG, The PRISMA Group (2009). Preferred Reporting Items for Systematic Reviews and Meta-Analyses: The PRISMA Statement. PLoS Med 6(6): e1000097. doi:10.1371/journal.pmed1000097

For more information, visit: [www.prisma-statement.org](http://www.prisma-statement.org).

Page 2 of 2

For peer review only
