# Supplementary material for: Patient experience of NHS health checks: a systematic review and qualitative synthesis
Source: PubMed Central journal article supplement (PMC5724113; doi:10.1136/bmjopen-2017-017169), 2017-08-11
Supplement: bmjopen-2017-017169supp001.pdf [file bmjopen-2017-017169supp001.pdf]

### Appendix 3 – Quality assessment of qualitative studies

| Author and date       | Study addressed a clearly focused issue | Appropriateness of qualitative method | Design | Recruitment | Consideration of relationship between research and participants | Ethical issues | Rigor of data analysis | Clarity of statement of findings | Overall |
|-----------------------|-----------------------------------------|---------------------------------------|--------|-------------|-----------------------------------------------------------------|----------------|------------------------|----------------------------------|---------|
| Alford 2010           | ●                                       | ●                                     | ●      | ●           | ●                                                               | ●              | ●                      | ●                                | Medium  |
| Baker 2014            | ●                                       | ●                                     | ●      | ●           | n/a                                                             | ●              | ●                      | ●                                | High    |
| Chipchase 2011        | ●                                       | ●                                     | ●      | ●           | ●                                                               | ●              | ●                      | ●                                | High    |
| Corlett 2015          | ●                                       | ●                                     | ●      | ●           | ●                                                               | ●              | ●                      | ●                                | Medium  |
| Greenwich 2011        | ●                                       | ●                                     | ●      | ●           | ●                                                               | ●              | ●                      | ●                                | Medium  |
| Ismail and Atkin 2015 | ●                                       | ●                                     | ●      | ●           | ●                                                               | ●              | ●                      | ●                                | High    |
| Jenkinson 2015        | ●                                       | ●                                     | ●      | ●           | ●                                                               | ●              | ●                      | ●                                | High    |
| Krska 2015            | ●                                       | ●                                     | ●      | ●           | n/a                                                             | ●              | ●                      | ●                                | Medium  |
| McNaughton 2015       | ●                                       | ●                                     | ●      | ●           | ●                                                               | ●              | ●                      | ●                                | High    |
| Oswald 2010           | ●                                       | ●                                     | ●      | ●           | ●                                                               | ●              | ●                      | ●                                | Medium  |
| Perry 2014            | ●                                       | ●                                     | ●      | ●           | ●                                                               | ●              | ●                      | ●                                | High    |
| Riley 2015 (JPH)      | ●                                       | ●                                     | ●      | ●           | ●                                                               | ●              | ●                      | ●                                | High    |
| Riley 2015 (BMC HSR)  | ●                                       | ●                                     | ●      | ●           | ●                                                               | ●              | ●                      | ●                                | High    |
| Shaw 2015             | ●                                       | ●                                     | ●      | ●           | ●                                                               | ●              | ●                      | ●                                | High    |
| Strutt 2011           | ●                                       | ●                                     | ●      | ●           | ●                                                               | ●              | ●                      | ●                                | High    |

● Low ● Medium ● High
