# Supplementary material for: Patient experience of NHS health checks: a systematic review and qualitative synthesis
Source: PubMed Central journal article supplement (PMC5724113; doi:10.1136/bmjopen-2017-017169), 2017-08-11
Supplement: bmjopen-2017-017169supp002.pdf [file bmjopen-2017-017169supp002.pdf]

## Appendix 1 – Search strategies

| Database     | Search strategy                                                                                                                                                                                                                                                                                                                                                                                                                                                                                                                                                                                                                                                                                                                                                                                        |
|--------------|--------------------------------------------------------------------------------------------------------------------------------------------------------------------------------------------------------------------------------------------------------------------------------------------------------------------------------------------------------------------------------------------------------------------------------------------------------------------------------------------------------------------------------------------------------------------------------------------------------------------------------------------------------------------------------------------------------------------------------------------------------------------------------------------------------|
| Ovid Medline | <ol style="list-style-type: none"><li>1. health check*.tw.</li><li>2. (diabetes adj3 screen*).tw.</li><li>3. (cardiovascular adj3 screen*).tw.</li><li>4. (population adj2 screen*).tw.</li><li>5. (risk factor adj3 screen*).tw.</li><li>6. (opportunistic adj3 screen*).tw.</li><li>7. medical check*.tw.</li><li>8. general check*.tw.</li><li>9. periodic health exam*.tw.</li><li>10. annual exam*.tw.</li><li>11. annual review*.tw.</li><li>12. NHSHC.tw.</li><li>13. 1 or 2 or 3 or 4 or 5 or 6 or 7 or 8 or 9 or 10 or 11 or 12</li><li>14. cardiovascular adj3 prevention.tw.</li><li>15. (primary care or general practice or primary healthcare).tw</li><li>16. 14 and 15</li><li>17. Cardiovascular Diseases/ AND Primary Prevention/</li><li>18. 16 or 17</li><li>19. 13 or 18</li></ol> |
| PubMed       | <ol style="list-style-type: none"><li>1. health check*</li><li>2. diabetes screen*</li><li>3. cardiovascular screen*</li><li>4. population screen*</li><li>5. risk factor screen*</li><li>6. opportunistic screen*</li><li>7. medical check*</li><li>8. general check*</li><li>9. periodic health exam*</li><li>10. annual exam*</li><li>11. annual review*</li><li>12. NHSHC</li><li>13. 1 or 2 or 3 or 4 or 5 or 6 or 7 or 8 or 9 or 10 or 11 or 12</li><li>14. Cardiovascular Diseases AND Primary Prevention[MeSH Terms]</li><li>15. "primary care"[Text Word] OR "general practice"[Text Word] OR "primary healthcare"[Text Word])</li><li>16. (cardiovascular[Text Word] AND prevention[Text Word])</li><li>17. #15 and #16</li><li>18. #14 or #17</li><li>19. #13 or #18</li></ol>              |
| Ovid Embase  | <ol style="list-style-type: none"><li>1. health check*.tw.</li><li>2. (diabetes adj3 screen*).tw.</li><li>3. (cardiovascular adj3 screen*).tw.</li><li>4. (population adj2 screen*).tw.</li></ol>                                                                                                                                                                                                                                                                                                                                                                                                                                                                                                                                                                                                      |

5. (risk factor adj3 screen\*).tw.
6. (opportunistic adj3 screen\*).tw.
7. medical check\*.tw.
8. general check\*.tw.
9. periodic health exam\*.tw.
10. annual exam\*.tw.
11. annual review\*.tw.
12. NHSHC.tw.
13. periodic medical examination/
14. 1 or 2 or 3 or 4 or 5 or 6 or 7 or 8 or 9 or 10 or 11 or 12 or 13
15. cardiovascular adj3 prevention.tw.
16. (primary care or general practice or primary healthcare).tw
17. 15 and 16
18. cardiovascular disease/ AND primary prevention/
19. 17 or 18
20. 14 or 19

Ovid HMIC

- 1 "health check\*".af.
- 2 health checks/
- 3 (cardiovascular or vascular or heart or diabetes or stroke).af.
- 4 (screen\* or risk).af.
- 5 3 AND 4
- 6 1 OR 2 or 5
- 7 cardiovascular adj3 prevention.tw.
- 8 (primary care or general practice or primary healthcare).tw
- 9 7 and 8
- 10 Cardiovascular diseases/ AND exp preventive medicine/
- 11 9 or 10
- 12 6 or 11

EBSCO  
CINAHL

- S10 S1 OR S2 OR S9  
 S9 S5 OR S8  
 S8 S6 AND S7  
 S7 (MH "Preventive Health Care+")  
 S6 (MH "Cardiovascular Diseases+")  
 S5 S3 AND S4  
 S4 "primary care" or "general practice" or "primary healthcare"  
 S3 TX cardiovascular N3 prevention  
 S2 (diabetes N3 screen\*) OR (cardiovascular N3 screen\*) OR  
 (population N2 screen\*) OR (risk factor N3 screen\*) OR (opportunistic  
 N3 screen\*) OR "medical check\*" OR "general check\*" OR "periodic  
 health exam\*" OR "annual exam\*" OR "annual review\*" OR NHSHC  
 S1 health check\*

EBSCO Global  
Health

- S10 S6 OR S19 OR S3 Limiters - Publication Year: 2016  
 S9 S7 AND S8  
 S8 DE "preventive medicine"  
 S7 DE "cardiovascular diseases"  
 S6 S4 AND S5  
 S5 "primary care" or "general practice" or "primary healthcare"

S4 TX cardiovascular N3 prevention  
S3 S1 OR S2  
S2 (diabetes N3 screen\*) OR (cardiovascular N3 screen\*) OR  
(population N2 screen\*) OR (risk factor N3 screen\*) OR (opportunistic  
N3 screen\*) OR "medical check\*" OR "general check\*" OR "periodic  
health exam\*" OR "annual exam\*" OR "annual review\*" OR NHSHC  
S1 health check\*

HDAS PsycInfo 1 "health check\*".af.  
2 PHYSICAL EXAMINATION/  
3 HEALTH SCREENING/  
4 "diabetes screen\*".af  
5 "cardiovascular screen\*".af  
6 "population screen\*".af  
7 ("opportunistic\* screen\*" OR "risk factor screen\*").af  
8 ("medical check\*" OR "general check\*" OR "periodic health exam\*" OR "annual exam\*" OR "annual review\*" OR NHSHC).af  
9 1 OR 2 OR 3 OR 4 OR 5 OR 6 OR 7 OR 8  
10 cardiovascular.ti,ab  
11 prevention.ti,ab  
12 10 AND 11  
13 CARDIOVASCULAR DISORDERS/  
14 PREVENTIVE MEDICINE/  
15 13 AND 14  
16 12 OR 15  
17 9 OR 16

Web of Science, Science Citation Index "health check\*" OR "diabetes screen\*" OR "cardiovascular screen\*" OR "population screen\*" OR "risk factor screen\*" OR "Opportunistic screen\*" OR "medical check\*" OR "general check\*" OR "periodic health exam\*" OR "annual exam\*" OR "annual review\*" OR NHSHC  
OR  
(Cardiovascular NEAR/3 prevention) AND ("primary care" OR "general practice" OR "primary healthcare")  
Limit to: England, Scotland, Wales, North Ireland

Cochrane Library (Wiley) #1 "health check\*"  
#2 (diabetes next/3 screen\*) or (cardiovascular next/3 screen\*) or (population next/2 screen\*) or (opportunistic next/2 screen\*) or ("risk factor" next/3 screen\*) or "medical check\*" or "general check\*" or "periodic health exam\*" or "annual exam\*" or "annual review\*" or NHSHC  
#3 cardiovascular adj3 prevention.tw.  
#4 (primary care or general practice or primary healthcare).tw  
#5 #3 and #4  
#6 MeSH descriptor: [Cardiovascular Diseases] this term only  
#7 MeSH descriptor: [Primary Prevention] explode all trees  
#8 #6 and #7  
#9 #5 or #8  
#10 #1 or #2 or #9

|                                               |                                                                                                 |
|-----------------------------------------------|-------------------------------------------------------------------------------------------------|
| NHS Evidence                                  | “health check*” OR cardiovascular prevention primary care                                       |
| TRIP database                                 | “health check*” OR cardiovascular prevention primary care                                       |
| Google Scholar                                | "nhs health check"<br>cardiovascular “health check”<br>cardiovascular prevention “primary care” |
| Google                                        | "nhs health check"<br>cardiovascular prevention “primary care”<br>cardiovascular “health check” |
| Clinical<br>trials.gov and<br>ISRCTN registry | “health check”                                                                                  |
