# Supplementary material for: Patient experience of NHS health checks: a systematic review and qualitative synthesis
Source: PubMed Central journal article supplement (PMC5724113; doi:10.1136/bmjopen-2017-017169), 2017-08-11
Supplement: bmjopen-2017-017169supp003.pdf [file bmjopen-2017-017169supp003.pdf]

## Appendix 2 – Quality assessment of quantitative studies

| Author, date           | Study addressed a clearly focused issue | Use of an appropriate method | Recruitment | Exposure measurement | Outcome measurement | Confounding factors | Applicability to England | Overall |
|------------------------|-----------------------------------------|------------------------------|-------------|----------------------|---------------------|---------------------|--------------------------|---------|
| Baker 2014             | ●                                       | ●                            | ●           | ●                    | ●                   | ●                   | ●                        | High    |
| Corlett 2015           | ●                                       | ●                            | ●           | ●                    | ●                   | ●                   | ●                        | High    |
| Cowper 2013            | ●                                       | ●                            | ●           | ●                    | ●                   | ●                   | ●                        | Low     |
| Krska 2015             | ●                                       | ●                            | ●           | ●                    | ●                   | ●                   | ●                        | High    |
| LGA – East Riding 2015 | ●                                       | ●                            | ●           | ●                    | ●                   | ●                   | ●                        | Low     |
| NHS Greenwich          | ●                                       | ●                            | ●           | ●                    | ●                   | ●                   | ●                        | Medium  |
| ‘A picture of Health’  | ●                                       | ●                            | ●           | ●                    | ●                   | ●                   | ●                        | Low     |
| Taylor 2012            | ●                                       | ●                            | ●           | ●                    | ●                   | ●                   | ●                        | High    |
| Trivedy 2016           | ●                                       | ●                            | ●           | ●                    | ●                   | ●                   | ●                        | Medium  |

● Low ● Medium ● High
